1 **Running Title: PORCN-independent Wnt signaling**

2

3 *Research article*

4

5 **WNT4 and WNT3A activate cell autonomous Wnt signaling independent of PORCN and secretion**

6

7 Deviyani M. Rao<sup>1</sup>, Rebecca L. Ferguson<sup>1</sup>, Evelyn K. Bordeaux<sup>1</sup>, Tomomi M. Yamamoto<sup>2</sup>, Benjamin G.  
8 Bitler<sup>2</sup>, Matthew J. Sikora<sup>1</sup>

9

10 *Affiliations*

11 <sup>1</sup>Dept. of Pathology, <sup>2</sup>Dept. of Obstetrics and Gynecology, University of Colorado Anschutz Medical  
12 Campus

13

14 *Corresponding author*

15 Matthew J. Sikora, PhD.; Mail Stop 8104, Research Complex 1 South, Room 5117, 12801 E. 17<sup>th</sup> Ave.;  
16 Aurora, CO 80045. Tel: (303)724-4301; Fax: (303)724-3712; email: matthew.sikora@ucdenver.edu.

17 Twitter: @mjsikora

18

19 *Manuscript pre-print*

20 This manuscript was posted as a pre-print on bioRxiv:

21 bioRxiv 333906; doi: <https://doi.org/10.1101/333906>

22

23 *Authors' contributions*

24 DMR and MJS conceived of the project and experiments. DMR, RLF, and MJS designed and performed  
25 experiments. RLF, DMR, and TMY developed models for the project. DMR, RLF, EKB, BGB, and MJS  
26 contributed to data analysis and interpretation. DMR wrote the draft manuscript; all authors read and  
27 revised the manuscript and have read and approved of this version of the manuscript.

28

29 *Key words*

30 WNT4, WNT3A, PORCN, Wnt signaling, Wnt secretion

31 **Summary Statement**

- 32 Wnt proteins can mediate an atypical mode of cell-autonomous signaling, distinct from paracrine  
33 signaling, that is independent of both palmitoylation by PORCN and Wnt secretion.

34 **Abstract**

35 The enzyme PORCN is considered essential for Wnt secretion and signaling. However, PORCN  
36 inhibition did not phenocopy the effects of WNT4 knockdown in WNT4-dependent breast cancer cells,  
37 suggesting an atypical role for PORCN in WNT4 signaling. WNT4 or WNT3A were over-expressed in  
38 cell lines (breast and ovarian cancer, and fibrosarcoma). Conditioned medium from these cell lines, and  
39 co-culture systems, were used to assess Wnt secretion and activity. The dependence of Wnt secretion on  
40 PORCN and WLS was also tested. We observed that WLS was universally required for Wnt secretion and  
41 paracrine signaling. In contrast, the dependence of WNT3A secretion and activity on PORCN varied  
42 across cell lines, and WNT4 secretion was PORCN-independent in all models. Surprisingly, WNT4 did  
43 not present paracrine activity in any tested context. Absent the expected paracrine activity of secreted  
44 WNT4, we identified cell autonomous Wnt signaling activation by WNT4 and WNT3A, independent of  
45 PORCN and secretion. Direct transfection of Wnt protein activated the Wnt second messenger proteins  
46 DVL2 and DVL3, independent of activation of membrane receptors. The PORCN-independent, cell-  
47 autonomous Wnt signaling demonstrated herein may be critical in WNT4-driven cellular contexts, or  
48 those which are otherwise considered to have dysfunctional Wnt signaling.

49

## 50 **Introduction**

51 Wnt signaling is an ancestrally conserved pathway that plays fundamental roles in embryonic  
52 development and adult tissue homeostasis. Dysregulation of Wnt signaling is a causative factor for a  
53 range of human pathologies, including several forms of cancer (reviewed in (1)). As a result, inhibition of  
54 Wnt signaling has become an attractive therapeutic target in ongoing clinical trials, with some strategies  
55 targeting the upstream activation of signaling by Wnt proteins (1–3). Wnt proteins comprise a family of  
56 secreted glycoproteins that act as intercellular ligands, which stimulate a myriad of signal transduction  
57 cascades regulating cellular proliferation, stem cell renewal, cell motility, angiogenesis, and apoptosis (1,  
58 4–6). Wnt proteins are post-translationally modified by the O-acyltransferase Porcupine (PORCN), which  
59 palmitoylates Wnt proteins at single serine residues (2, 7–9). This lipidation forms a binding motif for  
60 interaction with Wntless (WLS), which chaperones Wnt proteins to the plasma membrane for secretion  
61 (8, 10, 11). Once secreted, Wnt proteins signal in a paracrine manner, binding nearby receptor complexes.  
62 Wnts typically bind a Frizzled (FZD) receptor in conjunction with the LRP5 or LRP6 co-receptor,  
63 resulting in activation of the Disheveled second messenger proteins (DVL1/2/3 in humans) and initiation  
64 of either canonical ( $\beta$ -catenin-dependent) or non-canonical ( $\beta$ -catenin-independent) signaling (1, 4). The  
65 essential initiating step in Wnt processing is palmitoylation by PORCN, which has prompted the  
66 development of PORCN inhibitors, including IWP compounds (11), WNT974 (a.k.a. LGK974) (3), and  
67 others (2, 12). PORCN inhibitors have been shown to block Wnt secretion, inhibit downstream Wnt  
68 signaling, and suppress Wnt-driven tumor growth in animal models (3, 13, 14), with WNT974 currently  
69 in Phase I/II clinical trials for cancer treatment (NCT01351103, NCT02278133). Based on these  
70 observations, PORCN inhibitors are an attractive strategy to target Wnt-driven pathologies.

71  
72 The Wnt protein WNT4 is critical in organogenesis of endocrine organs and regulation of bone mass, and  
73 underlies steroid hormone-related phenotypes in humans (15–22). WNT4 dysregulation via loss-of-  
74 function mutation results in developmental female to male sex reversal (23–26). Similarly, *WNT4*  
75 polymorphisms are associated with endocrine dysfunction, gynecological malignancies, reduced bone  
76 density with premature skeletal aging, and related phenotypes (27–33). WNT4 is also critical in mammary  
77 gland development, as *Wnt4* knockout in mouse mammary gland prevents progesterone-driven ductal  
78 elongation and branching during pregnancy (34, 35). In this context, activated progesterone receptor  
79 drives expression of *Wnt4* in mammary gland luminal cells resulting in paracrine signaling that supports  
80 maintenance of the mammary stem cell niche (6, 36–38). Despite these observed critical roles of WNT4  
81 in both normal and malignant tissues, WNT4 signaling is crudely understood due to varied context-  
82 dependent functions. In a cell type- and tissue-specific manner, WNT4 (human or murine) has been  
83 shown to regulate either canonical or non-canonical Wnt signaling, and has been shown to either activate

84 or suppress signaling (described in references herein). Further, conflicting reports exist as to whether  
85 Wnt4 can or cannot activate canonical Wnt signaling in the murine mammary gland (36, 39). As such,  
86 WNT4 has been described as a “problem child” among Wnt proteins. It is also unclear which FZD  
87 receptor complexes are utilized by WNT4, as WNT4 is often required for distinct, non-redundant  
88 functions versus other Wnt proteins (reviewed in (35)). Since WNT4 has myriad downstream signaling  
89 effects, inhibition of WNT4 upstream of Wnt effector pathways (e.g. with PORCN inhibitors) is an  
90 attractive approach to block WNT4 signaling in a “pathway indifferent” manner to treat WNT4-related  
91 pathologies.

92  
93 We recently reported that regulation of *WNT4* expression is co-opted by the estrogen receptor in a subtype  
94 of breast cancer, invasive lobular carcinoma (ILC) (40, 41). Estrogen-driven WNT4 is required in ILC  
95 cells for estrogen-induced proliferation and survival, as well as anti-estrogen resistance (41). Though  
96 WNT4-driven signaling in ILC is yet to be fully elucidated, ILC cells lack the capacity to engage  
97 canonical Wnt signaling, as the characteristic genetic loss of E-cadherin in ILC leads to loss of  $\beta$ -catenin  
98 protein (41, 42). This suggests WNT4 drives non-canonical Wnt signaling in ILC cells. Though the  
99 specific non-canonical pathway activated by WNT4 is unknown, PORCN inhibition should be an  
100 effective strategy to block WNT4 upstream and treat this subtype of breast cancer. However, treatment of  
101 ILC cells with PORCN inhibitors did not suppress growth or survival. These unexpected results initiated  
102 further studies into the mechanisms of WNT4 secretion and signaling. In this report, we show WNT4  
103 secretion is mediated by atypical mechanisms. Our observations challenge the paradigm that PORCN-  
104 mediated secretion is required for Wnt signaling, and suggest a novel process by which Wnt proteins,  
105 including WNT4, can initiate non-canonical Wnt signaling.

106

107

## 108 **Results**

### 109 *PORCN inhibition does not mimic WNT4 siRNA in lobular carcinoma cells*

110 We hypothesized that since ILC cells are dependent on WNT4 for proliferation and survival (41),  
111 inhibition of PORCN would phenocopy *WNT4* siRNA by blocking WNT4 secretion and downstream  
112 signaling. Proliferation and cell death were monitored by live cell imaging of MM134 (ILC) cells either  
113 transfected with siRNA targeting *PORCN* (siPORCN) or treated with PORCN inhibitor (PORCNi)  
114 LGK974. Proliferation was compared to untreated cells, and cells treated with the anti-estrogen  
115 fulvestrant (Fulv) or transfected with siRNA targeting *WNT4* (siWNT4), both of which strongly suppress  
116 growth. Cell death was monitored by SyTOX green fluorescence, and proliferation results were  
117 confirmed at the experimental endpoint by dsDNA quantification. As we previously reported, siRNA-

118 mediated *WNT4* knockdown or Fulv halt proliferation, and *WNT4* knockdown induces cell death (**Fig.**  
119 **1A**). However, neither genetic nor chemical PORCN inhibition had any effect on cell proliferation or  
120 survival of MM134 cells (**Fig. 1A,B**). Similar results were obtained in ILC cell line SUM44PE, as  
121 PORCN inhibitor at concentrations up to 1 $\mu$ M did not affect proliferation (**Supplemental Fig. 1**). These  
122 data suggest PORCN inhibition is not sufficient to inhibit *WNT4* function, and *WNT4* signaling likely  
123 occurs via PORCN-independent mechanisms.

124  
125 *WNT4 secretion is WLS-dependent but PORCN-independent*

126 Since targeting PORCN did not phenocopy *WNT4* knockdown, we further examined the role of PORCN  
127 in *WNT4* secretion. To facilitate Wnt secretion studies we over-expressed *WNT3A* or *WNT4* in MM134  
128 (MM134:W3 and MM134:W4; **Fig. 2A, Table 1**), and measured secreted Wnt proteins in conditioned  
129 medium collected from these cells. Of note, since many studies have noted drastic changes in secretion  
130 and activity caused by epitope tags (e.g. (8)), we performed all studies with non-tagged Wnt constructs.  
131 A general workflow for experiments assessing Wnt secretion and function, with a key indicating the  
132 general approach used in each figure panel herein, is shown in **Supplemental Fig. 2**.

133  
134 PORCN-mediated palmitoylation of Wnt proteins is commonly described as required for Wnt binding to  
135 WLS and transport to the cell surface for secretion (see Introduction), so we examined the requisite of  
136 PORCN (using PORCNi and siPORCN) or WLS (using siWLS) for Wnt secretion. Secreted *WNT3A* and  
137 *WNT4* were detected in conditioned medium from MM134:W3 and MM134:W4 respectively (**Fig. 2B**).  
138 Consistent with the lack of effect of cell proliferation, PORCNi treatment had no effect on *WNT4*  
139 secretion, and *WNT3A* secretion was also unaffected by PORCNi (**Fig. 2B, top**). Similarly, siPORCN  
140 had no effect on secretion of either *WNT4* or *WNT3A* (**Fig. 2B, bottom**). However, WLS was required  
141 for Wnt secretion, as siWLS suppressed secretion of both *WNT3A* and *WNT4* from MM134 (**Fig. 2B,**  
142 **bottom**). These data suggest that Wnt processing and secretion may be atypical in ILC cells, but the  
143 PORCN-independent secretion of *WNT4* is a potential mechanism of PORCNi resistance (**Figure 1**).

144  
145 To determine whether PORCN-independent *WNT4* secretion is ILC-specific, we utilized the HT1080  
146 fibrosarcoma cell line, a well-characterized model for Wnt secretion, signaling, and activity (8, 43).  
147 Importantly, HT1080 are derived from a bone-like tissue and thus are a relevant context for *WNT4*  
148 signaling (18, 22) (e.g. *WNT4* activates DVL via non-canonical Wnt signaling in HT1080 (8)). We  
149 generated *WNT3A* and *WNT4* over-expressing cells from both wild-type HT1080 and PORCN-knockout  
150 HT1080 (HT1080-PKO, clone delta-19 (43)) (**Fig. 2C, Table 1**), and assessed Wnt secretion as above.  
151 Unlike the ILC model, *WNT3A* secretion from HT1080 was PORCN-dependent, as *WNT3A* could be

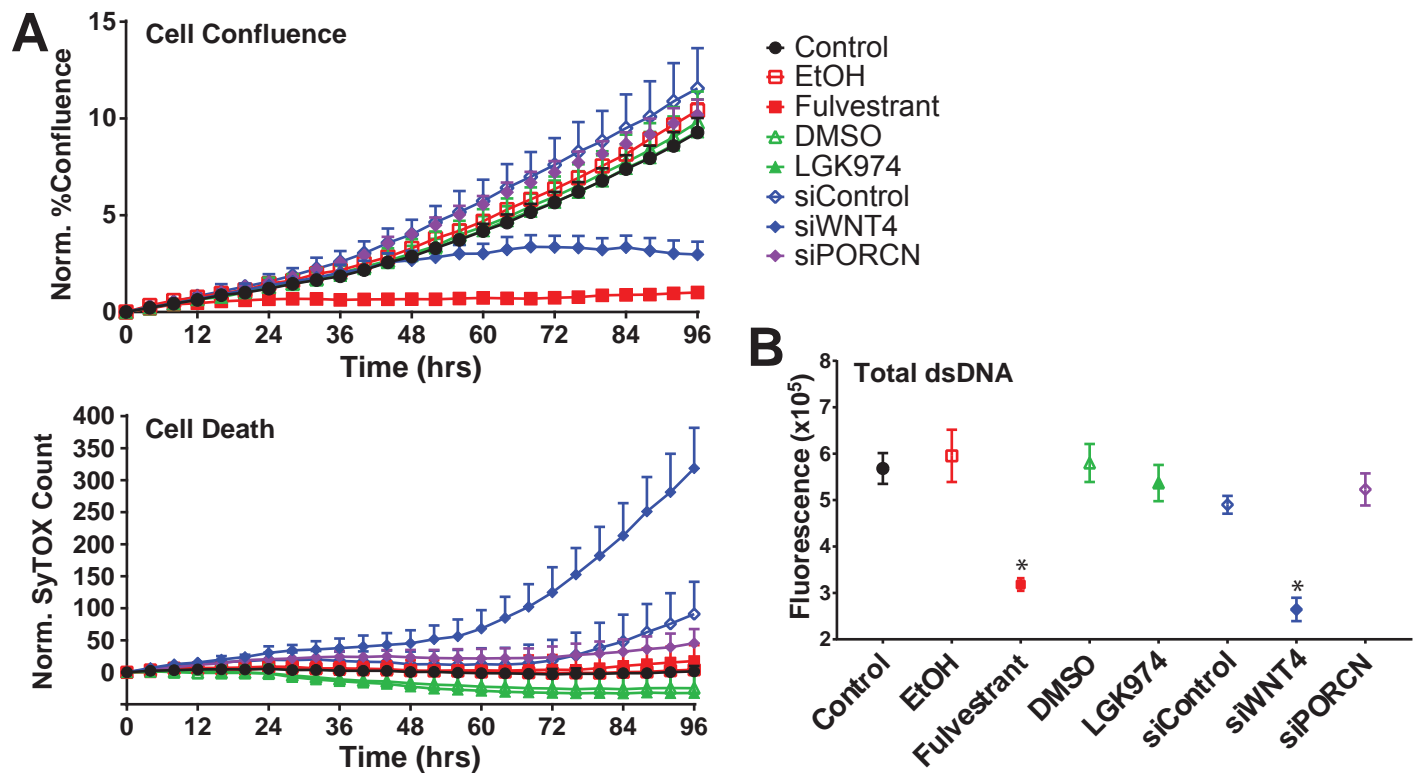

**Figure 1. Inhibition or knockdown of PORCN does not phenocopy knockdown of WNT4 in MM134.** (A), MM134 cells were transfected with siRNA or treated with fulvestrant (100nM), LGK974 (10nM), or 0.1% vehicle (EtOH or DMSO) at time 0, prior to live cell imaging for proliferation (phase-contrast confluence) and death (SyTOX green incorporation). Points represent mean of 6 biological replicates  $\pm$ SD. (B), Total double-stranded DNA was measured from assays in (A) at timecourse completion. \*,  $p < 0.05$  vs control, ANOVA with Dunnett's multiple correction. Results in A,B are representative of three independent experiments.

152 detected in conditioned medium from HT1080:W3 but not HT1080-PKO:W3 cells (**Fig. 2D**). PORCNI  
153 treatment also blocked WNT3A secretion from HT1080:W3 (**Supplemental Fig. 3A**). In contrast, WNT4  
154 secretion was detected from both HT1080:W4 and HT1080-PKO:W4 (**Fig. 2D**), and PORCNI did not  
155 suppress WNT4 secretion from HT1080:W4 (**Supplemental Fig. 3A**), supporting that WNT4 secretion is  
156 PORCN-independent.

157  
158 Endogenously expressed WNT4 was also detected in conditioned medium from HT1080 and HT1080-  
159 PKO cell lines (**Fig. 2D**). Of note, WNT4 secretion from HT1080 did not increase with *WNT4* over-  
160 expression (**Fig. 2D**), despite the increased WNT4 protein present in cell lysate (**Fig. 2C**), suggesting  
161 WNT4 secretion is an active process that is saturated in HT1080 cells. We observed that secreted WNT4  
162 can be resolved by electrophoresis as a doublet. The larger species was PORCN-dependent and not  
163 detected in HT1080-PKO, suggesting that these species represent palmitoylated versus non-palmitoylated  
164 proteins. Notably, in HT1080:W3 endogenous WNT4 shifted to the larger species (**Fig. 2D**, column 2),  
165 potentially due to positive feedback activation of PORCN activity (44). We observed loss of both species  
166 in conditioned media after *WNT4* knockdown by siRNA, confirming both secreted species as WNT4  
167 (**Supplemental Fig. 3A**). These data indicate that while WNT4 is modified by PORCN, PORCN is not  
168 required for WNT4 secretion. Knockdown of WLS by siRNA suppressed secretion of both WNT3A and  
169 WNT4 from HT1080 (**Fig. 2E**), confirming that while secretion of WNT3A is dependent on both PORCN  
170 and WLS, WNT4 secretion is PORCN-independent but WLS-dependent.

171  
172 Though WNT4 secretion was PORCN-independent in both MM134 and HT1080, WNT4 appeared to be  
173 post-translationally modified during secretion, as noted above (**Fig. 2D**). Also, in both MM134 and  
174 HT1080, secreted WNT4 migrated as a higher molecular weight species than WNT4 from cell lysate  
175 (**Supplemental Fig. 3B**). The increased molecular weight is likely due at least in part to glycosylation  
176 (45), as treatment with tunicamycin (N-linked glycosylation inhibitor) decreased the apparent molecular  
177 weight of secreted WNT4 in either cell line (**Supplemental Fig. 3B**). Notably, MM134 secreted two  
178 WNT4 species when treated with tunicamycin, suggesting WNT4 modification can be variable and cell  
179 context-specific.

180  
181 Together these data strongly indicate that WNT4 secretion is PORCN-independent, and also suggest that  
182 Wnt protein processing and signaling may be more broadly atypical in ILC. PORCN-independent WNT4  
183 secretion is a potential mechanism to explain the disparate effects of siWNT4 versus PORCN inhibition.  
184 However, it is unclear if Wnt proteins secreted independently of PORCN are competent to activate  
185 paracrine Wnt signaling.



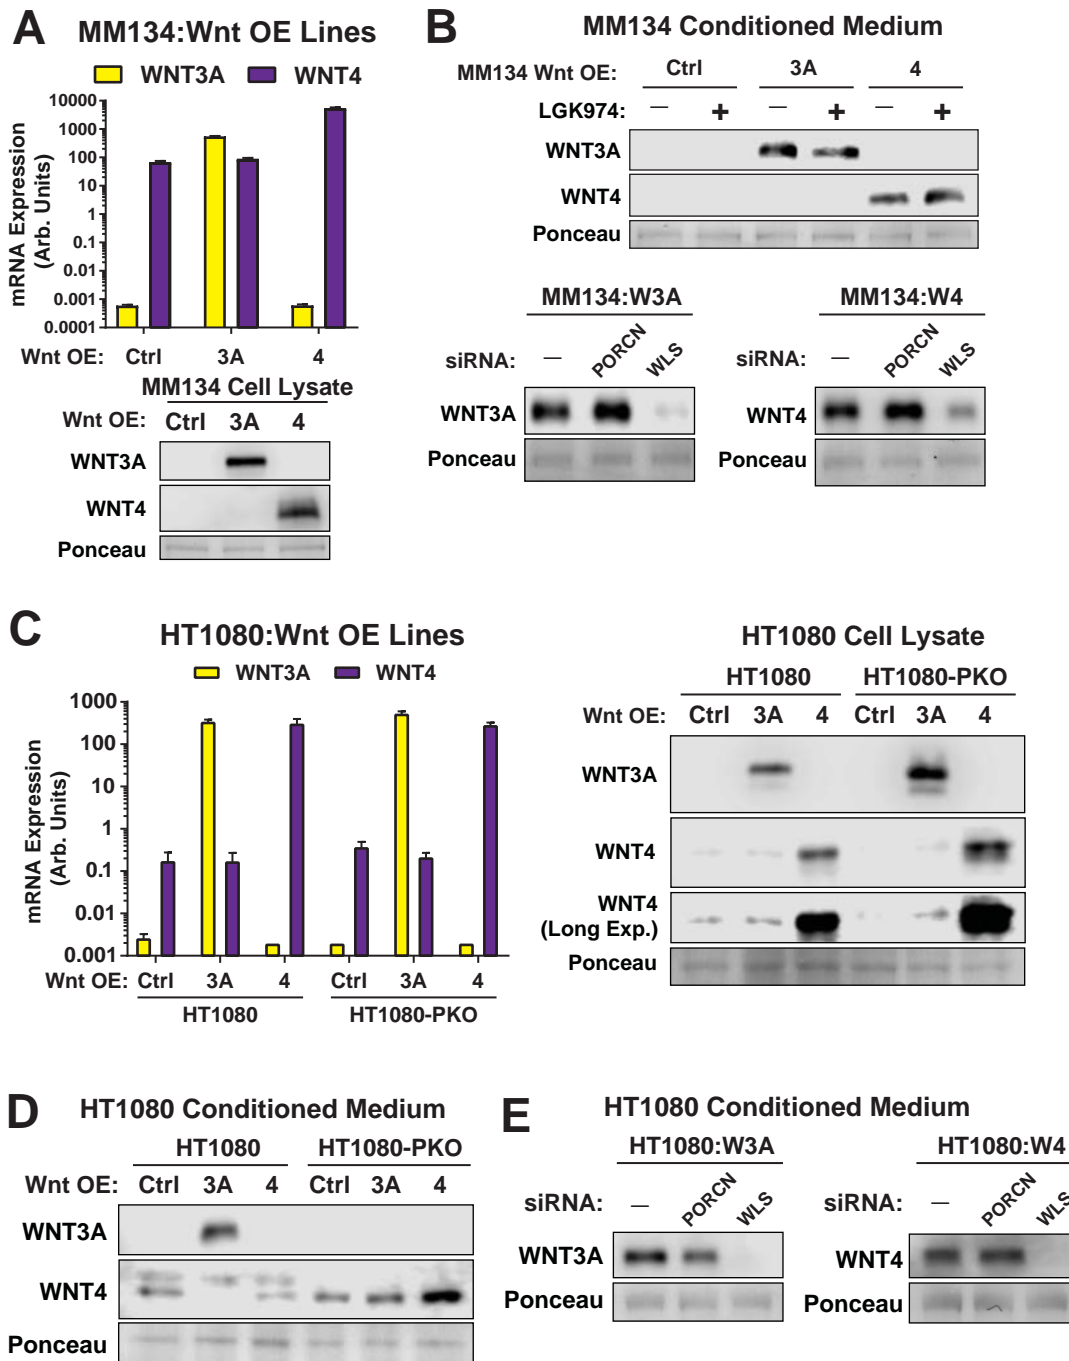

**Figure 2. WNT4 secretion is PORCN-independent, but WLS-dependent.**

(A), MM134 constitutive Wnt over-expression cell lines were created as detailed in Methods and Materials. Top, qPCR for WNT3A and WNT4. Bars represent mean of 2 technical replicates  $\pm$ SD. Bottom, immunoblot for cellular expression of WNT3A and WNT4. Endogenous WNT4 could not be visualized here due to the level of over-expression (B), Top, MM134 were treated with 10nM LGK974, and medium was allowed to condition for 7 days. Bottom, MM134 were transfected with siPORCN or siWLS, and after 24hrs, medium was changed and conditioned for 7 days. Total protein was extracted from medium as above for immunoblot. (C), HT1080 constitutive Wnt over-expression cell lines were created as detailed in Methods and Materials. Left, qPCR for WNT3A and WNT4. Bars represent mean of 3 technical replicates  $\pm$ SD. Right, immunoblot for cellular expression of WNT3A and WNT4. Over-expression shows endogenous WNT4 expression. (D), HT1080 medium was conditioned for 5 days as described in Materials and Methods, prior to total protein extraction for immunoblot. (E), HT1080 cells were transfected with siPORCN or siWLS, and after 24hrs, medium was changed and conditioned for 5 days. Total protein was extracted from medium as above for immunoblot.

186

187 *WNT4 over-expression does not activate paracrine Wnt signaling*

188 Since palmitoylation of Wnt proteins is typically considered necessary for activation of downstream  
189 signaling pathways, we assessed whether WNT4 secreted independent of PORCN was able to activate  
190 paracrine Wnt signaling. Paracrine signaling was tested by treating HT1080-PKO cells (“receiver” cells,  
191 PKO reduces endogenous paracrine Wnt signaling; see **Supplemental Fig. 2**) with conditioned medium  
192 from MM134 cells, with or without Wnt over-expression. After 24hr treatment with conditioned medium,  
193 activation of Wnt signaling in receiver cells was assessed via phosphorylation of DVL2, DVL3, and  
194 LRP6, and expression of  $\beta$ -catenin target gene *AXIN2*. Conditioned medium from neither MM134:W4 nor  
195 MM134:W3 were able to activate Wnt signaling in receiver cells by any measure (**Fig. 3A,B**) despite the  
196 presence of Wnt protein in conditioned medium from these cells (**Fig. 2B**). This suggests Wnt secretion is  
197 not sufficient for paracrine activity, but may be linked to the potentially atypical Wnt secretion in MM134  
198 (**Fig. 2**). We also assessed Wnt paracrine activity from wild-type vs PKO Wnt-overexpressing HT1080.  
199 Conditioned medium from HT1080:W3 activated Wnt signaling in the receiver cells by all measures (**Fig.**  
200 **3C,D**), and this was blocked by PORCN knockout (no activity using conditioned medium from HT1080-  
201 PKO:W3), consistent with a lack of WNT3A secretion in HT1080-PKO (**Fig. 2D**). However, conditioned  
202 medium from neither HT1080:W4 nor HT1080-PKO:W4 activated Wnt signaling in the receiver cells  
203 (**Fig. 3C,D**) despite our ability to detect secreted WNT4 in both contexts (**Fig. 2D**). Thus, secreted WNT4  
204 from MM134, HT1080, or HT1080-PKO was unable to activate paracrine Wnt signaling.

205

206 Paracrine signaling by Wnt proteins can be mediated by Wnt secretion as well as by Wnt presentation on  
207 the cell surface and subsequent cell-cell contact (46, 47). To determine whether paracrine WNT4  
208 signaling is initiated not by secretion but via cell-cell contact, we used a co-culture model to determine  
209 whether Wnt signaling could be activated in “receiver” cells via co-culture with Wnt-overexpressing  
210 cells. HT1080-PKO cells were transfected with the TOP-FLASH reporter (“receiver” cells), then co-  
211 cultured with cells expressing WNT3A or WNT4 (**Fig. 3E**). WNT3A-expressing cells were able to  
212 activate TOP-FLASH in co-cultured cells in a PORCN-dependent manner (i.e. blocked by LGK974, and  
213 absent from HT1080-PKO:W3 cells). However, under no condition was WNT4 able to activate TOP-  
214 FLASH in co-cultured cells. While WNT3A is able to mediate paracrine Wnt signaling in both secreted  
215 and co-culture models, neither secreted nor cell surface WNT4 is able to mediate paracrine signaling.

216

217 Since WNT4 from neither HT1080 nor MM134 cells was able to activate paracrine Wnt signaling, we  
218 treated HT1080-PKO cells with recombinant human Wnt proteins (rWNT3A and rWNT4; 10-500ng/mL).  
219 rWNT3A activated Wnt signaling by all measures, while rWNT4 failed to activate Wnt signaling at any

220 concentration (**Fig. 3F,G**). These data suggest that HT1080 may be non-responsive to paracrine WNT4,  
221 raising the need for orthogonal systems to validate the function of both secreted and recombinant WNT4.  
222

223 To further examine the function of recombinant and secreted WNT4, we used MC3T3-E1 as an additional  
224 “receiver” cell line (**Supplemental Fig. 2**). MC3T3-E1 cells are another bone-like model that are highly  
225 responsive to exogenous Wnt protein and induce alkaline phosphatase production upon Wnt signaling  
226 activation, which can be measured by colorimetric assay (see Materials and Methods; (48)). Conditioned  
227 medium from Wnt-expressing cells as above was used to treat “receiver” 3T3-E1 cells, and alkaline  
228 phosphatase (AP) activity was used as the readout for activation of paracrine Wnt signaling. As expected,  
229 increasing concentrations of either rWNT3A or rWNT4 increased AP activity (**Fig. 4A**), and both  
230 rWNT3A and rWNT4 induced DVL and LRP6 phosphorylation in 3T3-E1 cells (**Supplemental Fig. 4A**).  
231 This confirmed that 3T3-E1 respond to paracrine WNT4, and could be used to assess the activity of  
232 secreted Wnts in conditioned medium. Conditioned medium from HT1080:W3, but not HT1080-  
233 PKO:W3, induced AP activity (**Fig. 4B**), consistent with a requirement of PORCN for paracrine WNT3A  
234 signaling. However, though rWNT4 induced AP activity in 3T3-E1, conditioned medium from neither  
235 HT1080:W4 nor HT1080-PKO:W4 induced AP activity (**Fig. 4B**). Parallel results were obtained using  
236 MM134, as conditioned medium from MM134:W3 induced AP activity in 3T3-E1, which was blocked by  
237 PORCNI treatment, but no AP activity was induced with MM134:W4 conditioned medium (**Fig. 4C**). We  
238 considered that the level of WNT4 protein secreted by cell lines tested may be insufficient to activate  
239 3T3-E1, given the reduced potency of rWNT4 vs rWNT3A (**Fig. 4A**). Using rWNT standard curves, we  
240 confirmed that secreted WNT3A and WNT4 in conditioned medium is within the range of rWNT  
241 concentrations that induce AP activity in this assay (**Supplemental Figure 4B-D**). Notably, commercially  
242 available rWNT3A and rWNT4 are produced lacking the N-terminal signal peptide, and both rWNT3A  
243 and rWNT4 migrated as a smaller peptide than the corresponding Wnt protein secreted from either  
244 HT1080 or MM134 (**Supplemental Fig. 4B-C**). Taken together, these results indicate secreted Wnt  
245 proteins are not equivalent to recombinant proteins, and have distinct capacities for activating paracrine  
246 Wnt signaling. However, while secreted WNT3A activated paracrine Wnt signaling in a context-  
247 dependent manner (based on both source and receiver cells), secreted WNT4 was unable to act as a  
248 functional paracrine signaling ligand in any tested context.

249  
250 *PORCN-independent WNT4 secretion and lack of paracrine activity is observed in varied model systems*  
251 Based on the atypical WNT4 secretion and lack of paracrine activity in the MM134 and HT1080, we  
252 examined Wnt secretion upon WNT3A or WNT4 over-expression in a second ILC cell line (SUM44PE),  
253 an additional breast cancer cell line (HCC1428), and an ovarian cancer cell line (PEO1) (**Table 1**). Like

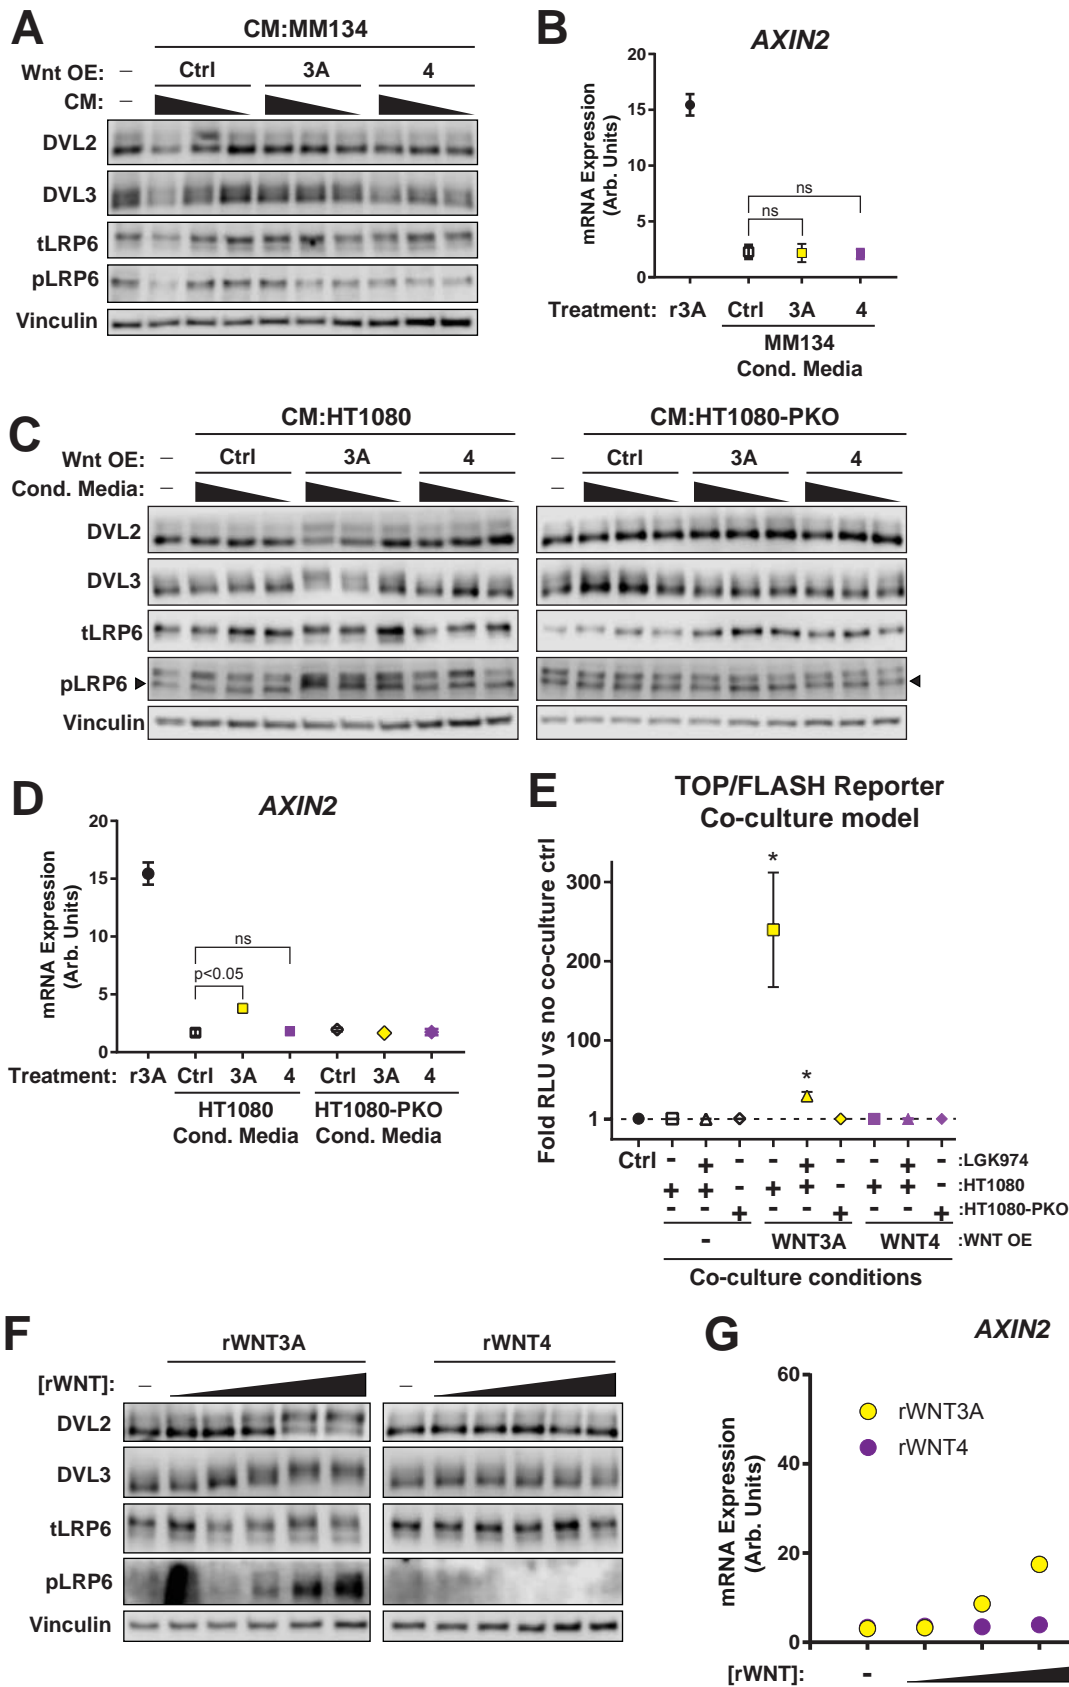

### **Figure 3. WNT4 does not activate paracrine Wnt signaling.**

(A-D) HT1080-PKO control cells were treated for 24 hours with conditioned media (CM, at 50%, 25% or 12.5% final volume supplemented with fresh medium) from either MM134 (A-B) or HT1080 cell lines (C-D). (A,C) Immunoblots of whole cell lysates from the treated HT1080-PKO cells were run and probed for DVL2, DVL3, total LRP6 and phosphorylated LRP6. (B,D) mRNA from the treated HT1080-PKO cells was extracted for qPCR for AXIN2 mRNA expression levels, vs RPLP0. Points represent mean of 2 technical replicates  $\pm$ SD. (B,D) Cells treated with 62.5ng/mL rWNT3A as a positive control. Statistics obtained using ANOVA with Dunnett's multiple correction. (E) HT1080-PKO cells were transfected with a TOP-FLASH reporter plasmid, then co-cultured with either HT1080 or HT1080-PKO WNT overexpressing (OE) cells, with or without 10nM LGK974. 'Ctrl' represents TOP-FLASH transfected HT1080-PKO without co-culture. WNT signaling activity, as measured by luminescence, was performed using a dual luciferase assay. Statistics obtained using Student's unpaired t-test compared to the no co-culture control (ctrl). \* represents  $p < 0.005$ . Points represent mean of 3 technical replicates  $\pm$ SD. Results are representative of two independent experiments. (F-G) HT1080-PKO control cells were treated for 24 hours with recombinant WNT protein (at concentrations of 10ng/ml, 50ng/ml, 100ng/ml, 250ng/ml, or 500ng/ml). (F) Immunoblots of whole cell lysates were run and (G) mRNA extracted for qPCR were performed as above (A-D). Statistics obtained using ANOVA with Dunnett's multiple correction. Points represent mean of 2 technical replicates  $\pm$ SD.

### 3T3-E1 Alkaline Phosphatase Activity

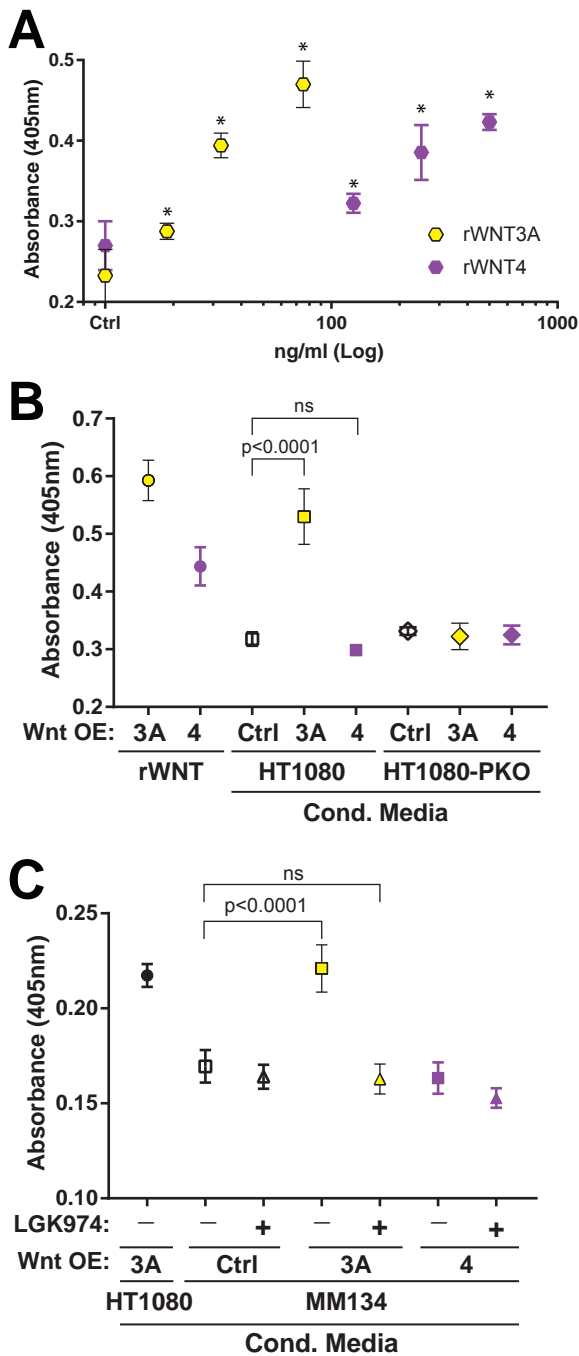

254 bone, ovarian cancer is a relevant context as WNT4 mediates Müllerian tissue and ovary development  
255 (23, 25). Wnt expression and secretion were assessed as above, and paracrine activity of secreted Wnt  
256 proteins was tested using the 3T3-E1 receiver model.

257  
258 Secreted WNT3A and WNT4 were detected after over-expression in SUM44PE (ILC, **Fig. 5A**). Similar  
259 to MM134, WNT4 secretion in SUM44PE was PORCN-independent but WLS-dependent (**Fig. 5B**).  
260 Despite strong WNT3A over-expression in cell lysate, secreted WNT3A from SUM44PE in conditioned  
261 medium was at detection limits. Over-expression of neither WNT3A nor WNT4 induced AP activity  
262 versus parental SUM44PE cells (**Fig. 5C**). LGK974 and siWLS modestly decreased basal AP activity  
263 versus respective controls, which may be due to secretion inhibition of other Wnt proteins in these cells.  
264 However, these data with SUM44PE are consistent with our observations of PORCN-independent Wnt  
265 secretion and inactive paracrine activity of secreted Wnt proteins in ILC. As observed in HT1080,  
266 WNT3A secretion and activity was PORCN-dependent, but secreted WNT4 lacked any paracrine activity,  
267 from both HCC1428 (**Fig. 5D-E**) and PEO1 (**Fig. 5F-G**). In total, we are unable to detect paracrine  
268 WNT4 activity in 5 cell lines derived from 3 different WNT4-responsive tissues of origin (mammary  
269 gland, bone, and ovary), further supporting that secreted WNT4 does not mediate paracrine signaling in  
270 WNT4 expressing cells.

271  
272 *Secreted or paracrine WNT4 are not required for ILC cell proliferation and viability*

273 Since secreted WNT4 did not activate paracrine Wnt signaling in MM134 or SUM44PE cells, we  
274 hypothesized that WNT4 secretion is dispensable for WNT4 function in ILC cells. To confirm this, we  
275 examined whether blocking WNT4 secretion by WLS knockdown would phenocopy WNT4 knockdown  
276 in MM134 cells. MM134 were transfected with siRNAs targeting WNT4, PORCN, or WLS, followed by  
277 cell proliferation and death assays as above. Despite the loss of WNT4 secretion, siWLS had no  
278 detrimental effect on MM134 proliferation or viability and did not phenocopy siWNT4 (**Supplemental**  
279 **Fig. 5A-B**). Similarly, we attempted to rescue WNT4 knockdown with conditioned medium from  
280 MM134 (with or without Wnt over-expression) or rWNT protein. Exogenous Wnt protein had no effect  
281 on siWNT4-mediated growth inhibition or cell death (**Supplemental Fig. 5C-D**). Considering the lack of  
282 paracrine activity by secreted WNT4, these data suggest that in some contexts, secretion may ultimately  
283 not have a functional role in the activation of Wnt signaling in WNT4-expressing cells.

284  
285 *WNT4 and WNT3A activate cell-autonomous signaling*

286 Our observations suggest WNT4 may activate signaling not via paracrine or autocrine mechanisms, but  
287 rather by a cell-autonomous mechanism. To examine cell-autonomous Wnt-induced signaling we



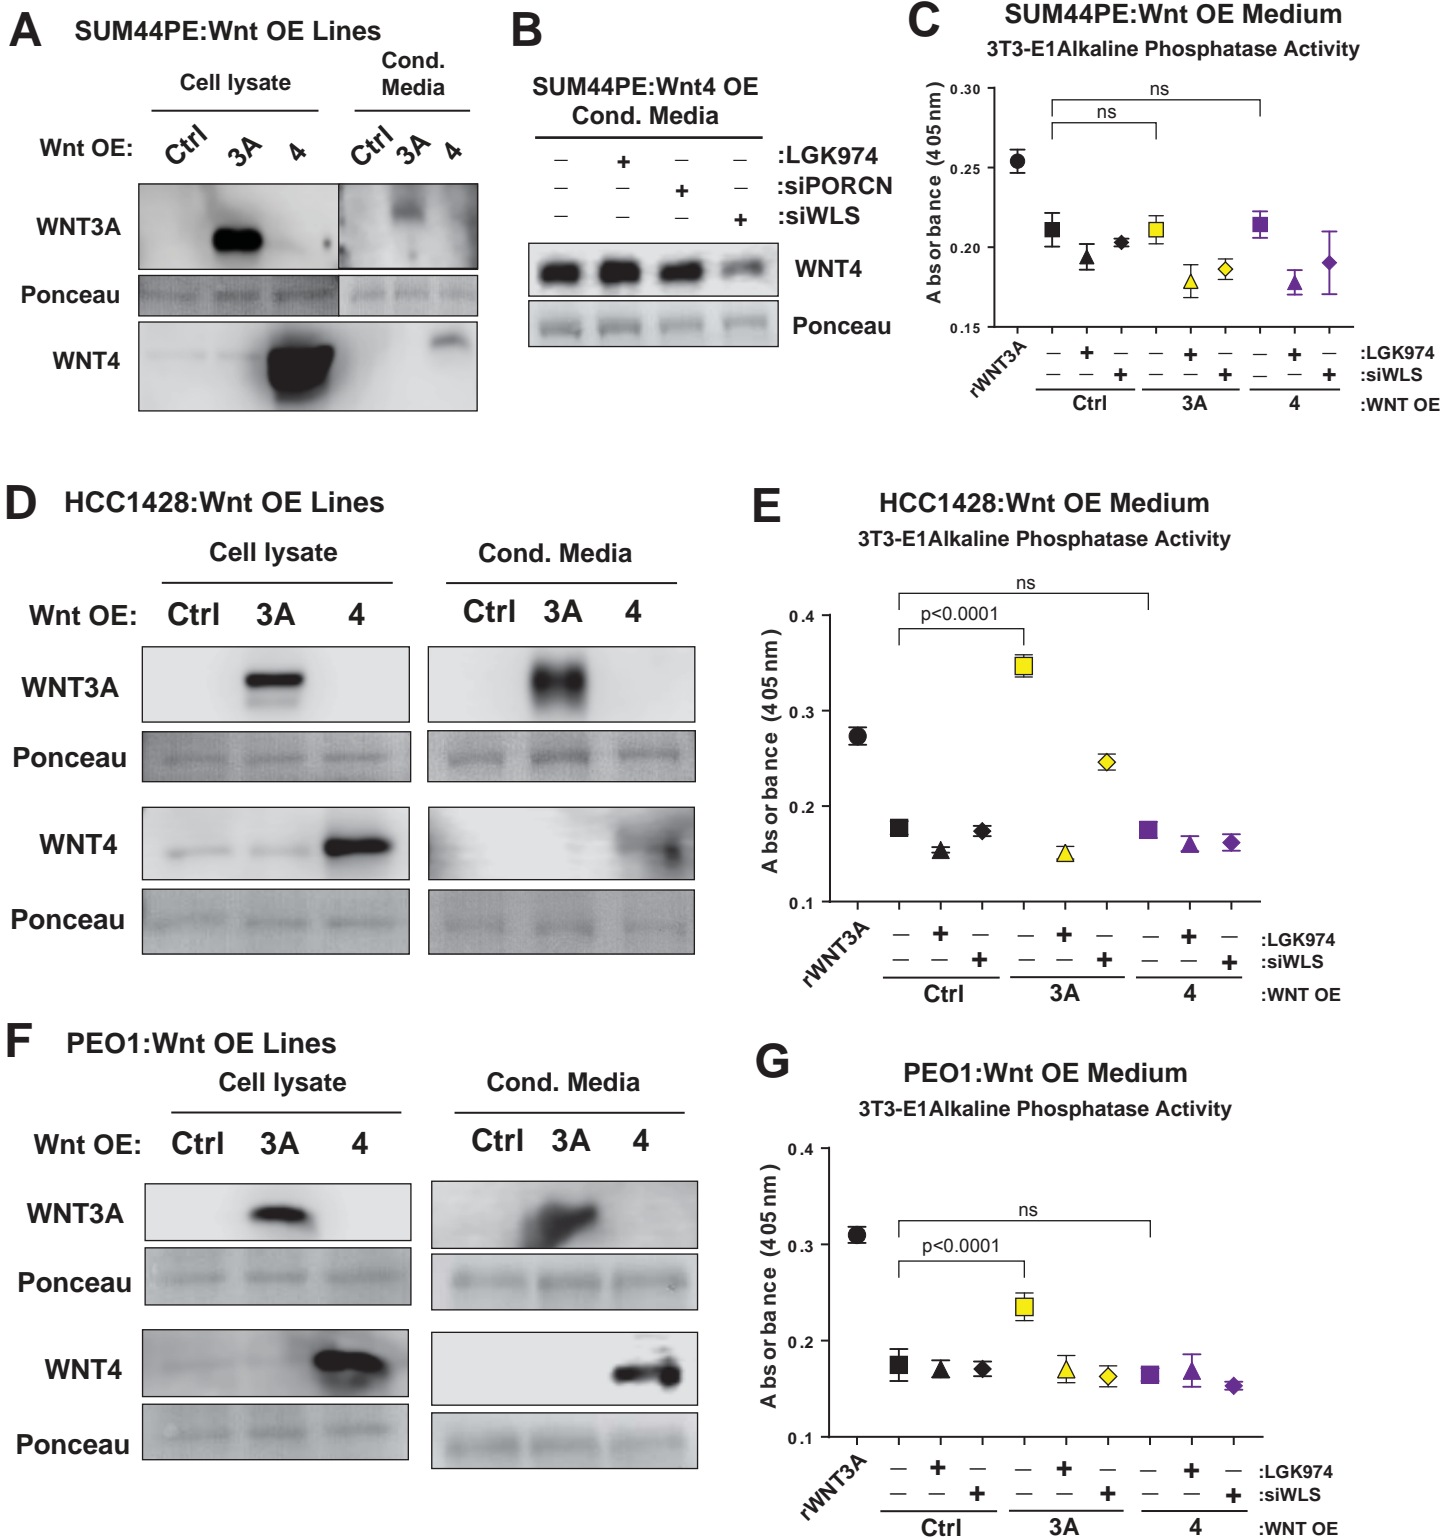

**Figure 5. WNT4 from various cell types lacks paracrine activity.**

Western blots of whole cell lysate or conditioned media from WNT3A or WNT4 overexpressing (A) SUM44PE, (D) HCC1428, or (F) PEO1 cell lines were probed for either WNT3A or WNT4. (B), A western blot of conditioned media from SUM44PE WNT4 over expressing cells treated with either LGK974, siPORCN or siWLS. Statistics obtained using ANOVA with Dunnett's multiple correction. Alkaline phosphatase production induced by conditioned media from WNT3A or WNT4 overexpressing (C) SUM44PE, (E) HCC1428 or (G) PEO1 cell lines was measured. Points represent a mean of 4 biological replicates  $\pm$ SD.



288 examined Wnt activity via DVL and LRP6 phosphorylation and *AXIN2* expression directly in HT1080  
289 and HT1080-PKO over-expressing WNT3A or WNT4 (**Fig. S2; Fig. 6A,B**). Consistent with conditioned  
290 medium/receiver cell experiments, both HT1080:W3 and HT1080:W4 had increased DVL and LRP6  
291 phosphorylation (**Fig. 6A**), but only HT1080:W3 had increased *AXIN2* expression (**Fig. 6B**). In HT1080-  
292 PKO, despite the inability of HT1080 to respond to paracrine (secreted or recombinant) WNT4 (**Fig. 3**)  
293 and the lack of PORCN-mediated WNT3A secretion, over-expression of either WNT3A or WNT4  
294 induced cell-autonomous DVL2 and DVL3 phosphorylation (**Fig. 6A**). However, consistent with loss of  
295 PORCN-mediated Wnt secretion, Wnt over-expression did not activate LRP6 in HT1080-PKO or induce  
296 *AXIN2* expression in HT1080-PKO cells. WNT3A or WNT4 over-expression in MM134 was not  
297 associated with DVL2/3 activation, suggesting cell autonomous Wnt signaling may activate cell-type  
298 specific pathways (**Supplemental Fig. 6**). Despite the observed secretion of either WNT3A or WNT4 in  
299 MM134 Wnt-overexpressing cells (**Fig. 2F**), no phosphorylation of LRP6 was observed, further  
300 supporting that secreted Wnt proteins lack the ability to induce paracrine signaling in MM134 (**Fig. S5**).

301  
302 As WNT4 is required for bone regeneration and cell proliferation (22), we examined if WNT4 is similarly  
303 essential for proliferation and/or viability of HT1080 or HT1080-PKO. We hypothesized that WNT4  
304 might be dispensable in HT1080, due to redundant Wnt signaling. However, without functional PORCN  
305 for secretion and paracrine signaling of Wnt family members, HT1080-PKO may become reliant on cell-  
306 autonomous PORCN-independent WNT4 signaling. Knockdown of WNT4 induced ~21% cell death at  
307 48h post-knockdown in HT1080 (**Fig. 6C**), leading to a modest suppression of proliferation (**Fig. 6D**). In  
308 contrast, WNT4 knockdown in HT1080-PKO strongly suppressed growth, and cell death was accelerated  
309 (~70% cell death at 48h post-knockdown). Importantly, minimal cell death was induced by WLS  
310 knockdown in either HT1080 or HT1080-PKO, despite global suppression of Wnt secretion in the latter  
311 with ablation of both PORCN and WLS. The sensitivity of HT1080-PKO to knockdown of WNT4, but  
312 not WLS, supports a critical role for secretion-independent functions of WNT4. Further, these data  
313 support that HT1080-PKO cells are reliant on cell-autonomous WNT4 signaling in the absence of  
314 paracrine signaling by other Wnt proteins.

315  
316 To determine whether cell autonomous Wnt signaling could be activated directly by intra-cellular Wnt  
317 protein, we transfected recombinant Wnt protein directly in to HT1080-PKO cells and examined  
318 activation of Wnt signaling as above, 4 hours post-treatment. Of note, these experiments used higher Wnt  
319 protein concentrations (~4000ng/mL) than in above paracrine signaling studies (**Fig. 3**); rWnt protein is  
320 also not identical to Wnt proteins produced endogenously (**Supplemental Fig. 4**). Compared to control  
321 transfection with FITC-labeled antibody, transfection of WNT3A or WNT4 activated DVL2/3

322 phosphorylation in HT1080-PKO (**Fig. 6E**). Though paracrine treatment with this high concentration of  
323 Wnt protein was sufficient to activate DVL2/3 with either WNT3A or WNT4, LRP6 was only  
324 phosphorylated with paracrine WNT3A. This indicates that transfected Wnt protein activates DVL2/3  
325 independent of extracellular activity, as observed in HT1080-PKO Wnt-overexpressing cells (**Fig. 6A,B**).

326

## 327 **Discussion**

328 The Wnt modifying enzyme PORCN is commonly described as a gatekeeper for the secretion of Wnt  
329 proteins, and thus PORCN inhibition is an approach to broadly block Wnt signaling without targeting cell  
330 type- or tissue-specific downstream Wnt pathways. WNT4 signaling is required for survival and  
331 proliferation of ILC cells, but we show that PORCN is dispensable, calling into question the role of  
332 PORCN in WNT4 signaling. PORCN was not required for WNT4 secretion from a panel of cell lines, as  
333 genetic or chemical PORCN blockade had no effect on WNT4 secretion. However, WNT4 was not capable  
334 of activating paracrine Wnt signaling in any model tested, despite the ability of recombinant human  
335 WNT4 to do so in a context-dependent manner. These data together suggest that secreted WNT4 may not  
336 be responsible for driving signaling in WNT4-expressing cells. Instead, we determined that WNT4 and  
337 WNT3A can activate cell autonomous, intra-cellular signaling independent of secretion. This unique  
338 mode of Wnt signaling (**Fig. 7**) is likely essential for the survival and proliferation of WNT4-dependent  
339 cells.

340

341 Our observations of PORCN-independent WNT4 signaling are supported by other studies that suggest a  
342 disconnect between PORCN activity and Wnt secretion/signaling, and support that the requirement for  
343 PORCN is context-dependent and not absolute. Nusse and colleagues reported PORCN-independent  
344 secretion and activity of *Drosophila* WntD (49). WntD is secreted at high levels in fly tissues and cell  
345 culture models, independent of both Porcupine and Wntless, and ablation of either Porcupine or Wntless  
346 did not affect WntD signaling in fly tissues. WntD utilizes the early secretory pathway protein Rab1  
347 GTPase (RAB1A homolog) for secretion, which represented a distinct and novel secretion mechanism  
348 versus Porcupine-mediated secretion of Wntless (WNT1 homolog). Importantly, WntD lacks the  
349 conserved serine residue that is palmitoylated by PORCN (49). WntD is thus unique among Wnt proteins,  
350 and is unlikely to be analogous to WNT4, but this supports that Wnt proteins can be secreted and signal  
351 independent of PORCN-driven modification. PORCN-independent Wnt secretion and signaling was also  
352 observed in a study of human primary cells by Richards et al (50). Neither PORCN-inhibitor IWP-2 nor  
353 *PORCN* siRNA knockdown suppressed secretion of any endogenously expressed Wnt proteins from  
354 CD8+ T-cells (Wnts 1, 3, 5B, 10B) or astrocytes (Wnts 1, 3, 6, 7A, 10A, 16). Wnt proteins secreted from  
355 IWP-2-treated cells were functional in conditioned medium experiments, but PORCN-independent

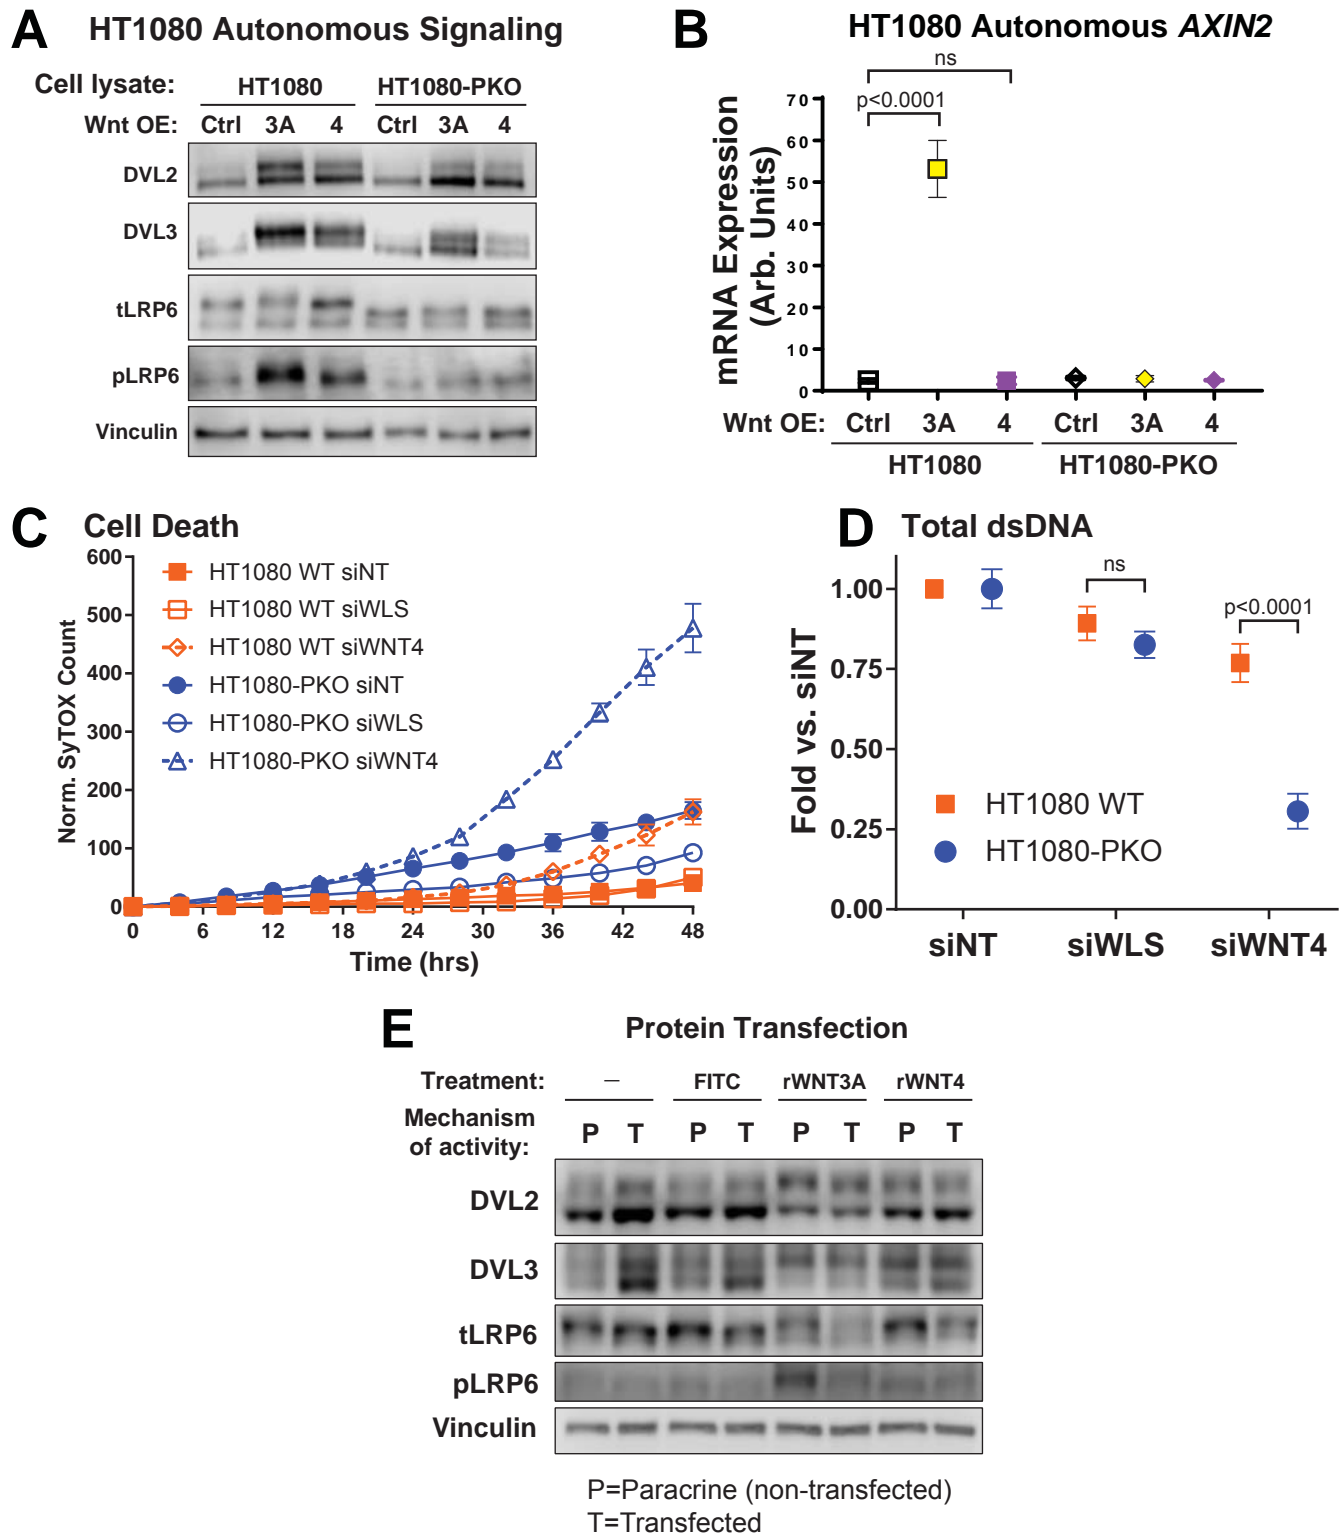

**Figure 6. WNT4 and WNT3A have cell autonomous activity independent of PORCN.**

(A), Whole cell lysates from HT1080 cell lines were harvested and immunoblotted for DVL2, DVL3, total LRP6 and phosphorylated LRP6. (B), mRNA from HT1080 cell lines was extracted and qPCR was performed to determine expression levels of AXIN2. Points represent a mean of 3 technical replicates  $\pm$ SD. (C-D), HT1080 (WT or PORCN null) cell lines transfected with siControl, siWLS, or siWNT4. (C), Cells were live cell imaged for cell death (SyTOX green) and (D), total double-stranded DNA was measured at timecourse completion. Points represent a mean of 6 biological replicates  $\pm$ SD. (E), HT1080 control cells were treated or transfected with 1  $\mu$ g of either a FITC-labeled antibody, rWNT3A or rWNT4. Whole cell lysates were harvested 4hr post-transfection and immunoblotted for DVL2, DVL3, total LRP6, or phosphorylated LRP6. Statistics obtained using ANOVA with Dunnett's multiple correction. Representative of two independent experiments.

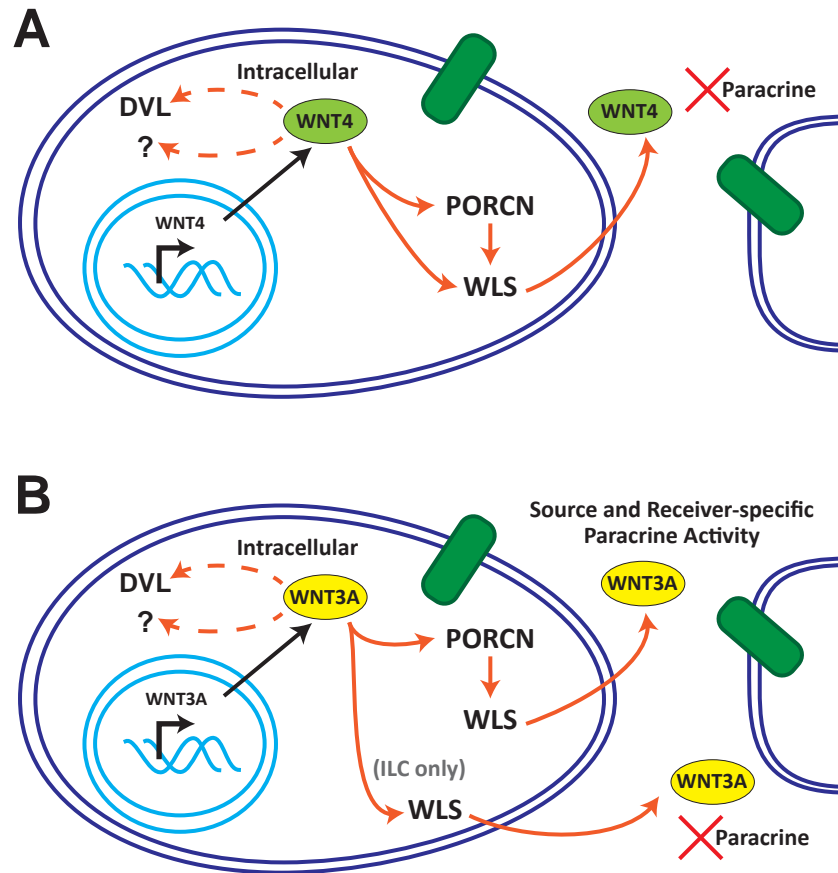

**Figure 7. Paracrine Wnt activity is context dependent based on Wnt ligand source and receiver cell.**

(A), WNT4 can be modified by PORCN during the process of secretion, but WNT4 can instead be secreted in a PORCN-independent, WLS-dependent manner. In either case, secreted WNT4 does not have paracrine activity in any context tested herein. Cell-autonomous WNT4 signaling can activate DVL proteins intracellularly, and likely signals via other pathways in ILC cells. (B), WNT3A can be secreted independent of PORCN from ILC cells, but PORCN function is overall required for paracrine activity. However, paracrine activity of WNT3A was dependent on the Wnt source and the receiver cell context. Source/receiver summary is shown in Supplemental Figure 7.

356 secretory mechanisms were not characterized. Other studies have shown that PORCN may differentially  
357 regulate the activity of individual Wnt proteins. In HEK293T cells, over-expression of PORCN and WLS  
358 together enhanced secretion of WNT1 (compared with WLS alone) but suppressed WNT1-induced  
359 paracrine or autocrine activation of  $\beta$ -catenin (versus WLS over-expression alone) (51). This was not  
360 observed with WNT3A, indicating PORCN specifically suppressed paracrine activity of WNT1, despite  
361 driving WNT1 secretion. Wnt-specific Porcupine functions have also been reported in Zebrafish (52).  
362 Knockdown of *porcn* in Zebrafish embryos suppressed secretion of Wnt5a and resulted in defects related  
363 to loss of non-canonical ( $\beta$ -catenin-independent) Wnt signaling. Conversely, canonical  $\beta$ -catenin-  
364 dependent Wnt signaling was not altered by *porcn* knockdown, and secretion of Wnt3a was not impaired.  
365 Similar data regarding specifically WNT4 are limited. A clinical *WNT4* mutation (L12P (24), discussed  
366 further below) blocks WNT4 palmitoylation but not secretion, yet ultimately is associated with WNT4  
367 loss-of-function, consistent with a disconnect between PORCN, WNT4 secretion, and WNT4 signaling.  
368 These studies together show that Wnt proteins secreted in PORCN-independent manners can be active in  
369 paracrine signaling models, but to our knowledge, this is the first report of PORCN-independent Wnt  
370 activity that is also independent of secretion. Of note, Kurita et al recently demonstrated that *Wnt4* siRNA  
371 in mouse pancreatic  $\beta$ -cells suppressed glucose-induced insulin secretion, but treatment with recombinant  
372 Wnt4 had no effect on insulin secretion (53). These data parallel our findings and support that WNT4 has  
373 a novel function in signaling independent of PORCN, secretion, and paracrine signaling.

374  
375 Our data, together with the above reports on PORCN-independent Wnt signaling, highlight that the roles  
376 of PORCN and WLS in Wnt modification, secretion, and signaling are context-dependent across  
377 individual Wnt proteins in a cell-type specific manner. This observed context-dependence includes not  
378 only the specific “receiver” cells in question (perhaps best understood in the context of differentially  
379 expressed FZD receptors), but also includes the source of the Wnt protein (**Fig. 7, Supplemental Fig. 7**).  
380 For example, WNT3A secreted from HT1080 robustly activated Wnt signaling in 3T3-E1 or HT1080-  
381 PKO cells, and PORCN was required for both secretion and paracrine activity. In contrast, WNT3A  
382 secreted from MM134 cells activated Wnt signaling in 3T3-E1 but not HT1080-PKO cells, and PORCN  
383 was required for paracrine activity but not secretion. Cell-type specific Wnt protein post-translational  
384 modification may drive these differences, as changes in modification (e.g. glycosylation patterns) has  
385 been shown to alter Wnt processing, secretion, and signaling (51, 54). This may be consistent with our  
386 observation that recombinant Wnt proteins were more promiscuously able to activate signaling than  
387 secreted Wnt proteins. For example, whereas rWNT4 activated 3T3-E1 cells, WNT4 secreted from any  
388 cell line tested did not activate 3T3-E1 Wnt signaling. This highlights that care needs to be taken when  
389 using recombinant Wnt proteins, as rWnt proteins may represent a specific species of secreted Wnt

390 protein that may or may not be active in the context of interest. Similarly, rWnt proteins may have a  
391 distinct functional capacity not reflected by their endogenous counterpart Wnt protein in a given context.  
392 Studies with rWNT proteins also will not capture potential contributions of autocrine or cell autonomous  
393 Wnt signaling.

394

395 Our observations indicate WNT4 and WNT3A likely signal via at least three distinct mechanisms: 1) as a  
396 secreted protein with PORCN modification; 2) as a secreted protein without PORCN modification; 3) by  
397 a cell-autonomous mechanism independent of secretion. This may offer an explanation for the myriad of  
398 context-dependent signaling pathways activated by WNT4, including activating canonical  $\beta$ -catenin  
399 activity (15, 36, 55), repressing  $\beta$ -catenin-driven transcription (56, 57), or activating non-canonical Wnt  
400 signaling pathways (22, 58). For example, PORCN-driven palmitoylation may mediate the ability of  
401 WNT4 to act via canonical versus non-canonical Wnt signaling, and/or via cell-autonomous mechanisms.  
402 Additionally, the differences we observed between recombinant and secreted WNT4 indicate differential  
403 protein processing may guide Wnt proteins to activate distinct signaling pathways. The commercially  
404 available recombinant Wnt proteins used in our study lack the N-terminal signal peptide (residues 1-22  
405 for WNT4), however, Wnt signal peptides may have important roles in the regulation of signaling activity  
406 (45). The WNT4 signal peptide has uniquely high percentages of arginine (14%) and serine (18%)  
407 compared to other human Wnts (average 5% and 9%, respectively), whereas WNT3A has no charged or  
408 polar residues in its signal peptide. Mutation in the signal peptide (L12P) of WNT4 has also been linked  
409 to Mayer-Rokitansky-Küster-Hauser syndrome (24). The L12P mutant functions as a dominant negative  
410 inhibitor and suppresses the activity of wild-type WNT4 when co-expressed. Although the L12P mutant  
411 protein is not palmitoylated, it is secreted and does not prevent secretion of wild-type protein (24). These  
412 observations are consistent with our findings of PORCN-independent WNT4 secretion. The mechanism  
413 of dominant-negative activity has not been described but suggests distinct forms of WNT4 may drive cell  
414 autonomous Wnt signaling. Identifying the sequence and protein modifications of potential WNT4  
415 species is an important future direction.

416

417 ILC may represent a unique context for paracrine Wnt signaling, as we observed that both WNT3A and  
418 WNT4 could be secreted from ILC cells in a PORCN-independent manner. While WNT3A activity  
419 remained dependent on PORCN (similar to Wnt5a in 293T cells (59)), the role of WNT4 processing in  
420 paracrine activity is unclear. However, this atypical Wnt processing in ILC cells (also observed in relation  
421 to glycosylation) may be related to broader Wnt signaling dysfunction. The genetic hallmark of ILC is the  
422 loss of E-cadherin (*CDH1*) (42), which leads to dysfunction of catenin proteins, including activation of  
423 p120 catenin (60) and in-activation of  $\beta$ -catenin. E-cadherin loss in ILC leads to a loss of  $\beta$ -catenin



424 protein in both patient tumors and cell lines (41, 42), and as a result,  $\beta$ -catenin-driven TOP-Flash reporter  
425 activity cannot be activated in ILC cells (41). This catenin protein dysfunction was previously postulated  
426 as being linked to PORCNI sensitivity, and ILC patients were specifically included in a trial of WNT974  
427 (NCT01351103). This trial opened in 2011, but by 2015 ILC patients were removed from the inclusion  
428 criteria. It is unclear whether this is due to accrual problems or a lack of efficacy, as neither have been  
429 specifically reported for ILC patients on this trial, although our data suggest PORCNI are unlikely to have  
430 clinical efficacy for ILC. This highlights the importance of defining the unique context for Wnt signaling  
431 in ILC, in particular for WNT4, based on our prior findings (41). Our laboratory has begun to characterize  
432 WNT4-driven signaling in ILC cells, which may be mediated by PORCN-independent, cell-autonomous  
433 WNT4 signaling.

434  
435 Importantly, our study uses diverse cell line models to investigate Wnt secretion and paracrine activity of  
436 Wnt proteins, which allowed us to identify the context-dependence of Wnt signaling described herein. We  
437 used non-tagged Wnt expression constructs, which eliminated previously described complications with  
438 altered processing and reduced activity for tagged Wnt proteins. Wnt signaling activity was measured by  
439 diverse yet redundant pathway readouts that facilitated our study of context-dependent Wnt signaling  
440 activities. The cell line models used for Wnt secretion were all cancer-derived, and thus **further study is**  
441 **needed** to translate our findings to normal tissue, developmental, or *in vivo* contexts. We observed  
442 identical processing and secretion for endogenously expressed WNT4 as for over-expressed WNT4  
443 (models used herein express low or no endogenous WNT3A), but over-expression was required to  
444 facilitate signaling experiments. As such, future studies will need to determine the contribution of  
445 endogenous Wnt protein levels to activating the signaling pathways discussed herein.

446  
447 The secretion and paracrine activity of Wnt proteins are heavily context-dependent, as WNT3A and  
448 WNT4 present with differing dependence on PORCN for secretion and paracrine activity in distinct  
449 model systems. Secretion of WNT4 is PORCN-independent and WLS-dependent, but WNT4 did not  
450 present paracrine activity in cells otherwise dependent on WNT4, indicative of cell-autonomous,  
451 secretion-independent activity. Both WNT4 and WNT3A presented cell-autonomous activity via non-  
452 canonical Wnt signaling, independent of secretion. Our studies identify a PORCN-independent mode of  
453 Wnt signaling may be critical to understanding cellular contexts which are otherwise considered to have  
454 dysfunctional Wnt signaling.

455

456 **Methods and Materials**

457 *Cell culture*

458 HT1080 and PORCN-knockout HT1080 (HT1080-PKO; clone delta-19) were a generous gift from Dr.  
459 David Virshup (43), and were maintained in DMEM/F12 (Corning, Corning, NY, USA, cat#10092CV) +  
460 10% FBS (Nucleus Biologics, San Diego, CA, USA, cat#FBS1824). MDA MB 134VI (MM134; ATCC,  
461 Manassas, VA, USA) and SUM44PE (BioIVT, Westbury, NY, USA) were maintained as described (40).  
462 PEO1 and HCC1428 (ATCC) were maintained in DMEM/F12 + 10% FBS. MC3T3-E1 (ATCC) were  
463 maintained in MEM Alpha without ascorbic acid (Thermo Fisher Scientific, Waltham, MA, USA,  
464 cat#A10490-01) + 10% FBS. Wnt overexpression lines were generated by lentiviral transduction of Wnt  
465 expression plasmids (see below) with selection of antibiotic-resistant pools, and were maintained in 2.5  
466 µg/mL blasticidin. PEO1:W3 were established by us previously (61). All lines were incubated at 37°C in  
467 5% CO<sub>2</sub>. Cell lines are authenticated annually by the University of Arizona Genetics Core cell line  
468 authentication service and confirmed to be mycoplasma negative every four months. Authenticated cells  
469 were in continuous culture <6 months.

470

471 *Reagents and plasmids*

472 LGK974 was obtained from Cayman Chemical (Ann Arbor, MI, USA, cat#14072) and was dissolved in  
473 DMSO. WntC59 was obtained from Tocris Biosciences (Bristol, UK, cat#5148) and was dissolved in  
474 DMSO. Fulvestrant was obtained from Tocris Biosciences (#1047) and was dissolved in EtOH.  
475 Tunicamycin was obtained from Cayman Chemical (# 11445) and reconstituted in DMSO. Recombinant  
476 human WNT3A (#5036-WN-010) and WNT4 (#6076-WN-005) were obtained from R&D Systems  
477 (Minneapolis, MN, USA) and reconstituted per the manufacturer's instructions.

478

479 Wnt plasmids used in this publication were a gift from Drs. Marian Waterman, David Virshup and Xi He  
480 (Addgene, Watertown, MA, USA, kit #1000000022) (8). The M50 Super 8x TOPFlash plasmid was a  
481 generous gift from Dr. Randall Moon (Addgene, plasmid #12456) ((62). Lentiviral vectors for WNT3A  
482 and WNT4 were generated by Gateway Recombination of pENTR-STOP Wnt open reading frames to  
483 pLX304, a kind gift from Dr. Bob Sclafani.

484

485 *Transient transfection assays*

486 HT1080 cells were transfected with Active WNT3A-V5 (G-8) and Active WNT4-V5 (G-10) from  
487 Addgene kit #1000000022. The transfection used Lipofectamine LTX Reagent with PLUS Reagent  
488 (Thermo Fisher Scientific, Cat# 15338100) using the manufacturer's instructions.

489



490 *Protein extraction from conditioned medium*

491 HT1080, MM134, HCC1428, or PEO1 cells were plated in full medium (as above, 10% FBS). Decreased  
492 FBS is required to reduce competition of serum proteins with secreted Wnt proteins during extraction.  
493 24hrs post-plating, medium was changed to reduced serum medium: DMEM/F12 + 2% FBS (HT1080,  
494 PEO1); DMEM + 2% FBS (HCC1428); DMEM/L15 + 5% FBS (MM134). Conditioned medium was  
495 harvested 4-5 days later for HT1080 cells and 6-7 days later for MM134, HCC1428 and PEO1 cells,  
496 typically once medium acidification was apparent by phenol red color change. SUM44PE cells are  
497 normally cultured in low serum (DMEM/F12 + 2% CSS), so standard medium was allowed to condition  
498 for 6-7 days before harvesting. Medium was centrifuged at 300xg for 4min to pellet any cells or debris.  
499 The supernatant was then syringe-filtered using a 0.2µm filter. The protein concentration of the  
500 conditioned medium was measured using a Pierce BCA Protein Assay Kit (Thermo Fisher Scientific,  
501 cat#23225), and medium volumes, normalized to total protein, were adjusted with sterile-filtered PBS.  
502 Strataclean resin (Agilent Technologies, Santa Clara, CA, USA, cat#400714) was added to the  
503 conditioned media at a ratio of 10µL of resin to 100µg of medium protein, and vortexed to re-suspend the  
504 resin. The medium+resin mixture was incubated, rotating at 4C for 30min, then centrifuged at 425xg for  
505 1min at 4C. The supernatant was then aspirated and the resin was washed using sterile-filtered PBS. The  
506 resin was centrifuged again at 425xg for 1min at 4C, and the supernatant was aspirated. An equal volume  
507 of 2X Laemmli sample buffer (Bio-Rad Laboratories, Hercules, CA, USA, cat#1610737) was added to  
508 the resin to release bound protein, and the slurry was heated at 95C for 5min. Slurry equivalent to 100ug  
509 of conditioned medium protein was run on SDS-PAGE gels to detect secreted WNT3A or WNT4 via  
510 immunoblotting (below).

511

512 *Alkaline phosphatase assay*

513 MC3T3-E1 cells were seeded into a 96-well plate at 10,000 cells/well. 24hrs later the cells were treated  
514 with either conditioned media (CM) or recombinant WNTs (rWNTs). 72hrs later, alkaline phosphatase  
515 activity was assessed, using *para*-Nitrophenyl phosphate (pNp) as a substrate and measuring absorbance  
516 at 405nm. Assay protocol is based on Nakamura et al (63) with buffer modifications provided by the  
517 recombinant Wnt manufacturer (R&D Systems). A more detailed protocol is available upon request.  
518 *para*-Nitrophenyl Phosphate tablets were obtained from Cayman Chemical (cat# 400090).

519

520 *Co-culture and Dual Luciferase Assay*

521 HT1080-PKO cells were transfected with both a TOP-FLASH and renilla reporter plasmid. 24 hours later,  
522 these cells were co-cultured with either HT1080 or HT1080-PKO WNT overexpressing cells, with or  
523 without 10nM LGK974 treatment. 48 hours later, luciferase and renilla activity was assessed using

524 Promega's Dual Luciferase Assay (Promega, Madison, WI, USA, cat# E1910) and a BioTek Synergy 2  
525 microplate reader (BioTek, Winooski, VT, USA) with a dual injector system according to the  
526 manufacturer's instructions.

527

#### 528 *Proliferation and viability assays*

529 Cells were seeded in a 96-well plate and 24hrs later cells were treated with 100nM Sytox green (Thermo  
530 Fisher Scientific, cat# S7020). The plate was then placed into an Incucyte Zoom (Essen Bioscience, Ann  
531 Arbor, MI, USA) for 4-5 days where they were imaged every 4hrs at 10x magnification. Cell confluence  
532 and cell death (Sytox green-positive counts) were assessed using Incucyte S3 software (v2018A). After  
533 time-course completion, total double-stranded DNA was measured by hypotonic lysis of cells in ultra-  
534 pure H<sub>2</sub>O, followed by addition of Hoechst 33258 (Thermo Fisher Scientific, #62249) at 1µg/mL in Tris-  
535 NaCl buffer (10mM Tris, 2M NaCl; pH 7.4) at equivalent volume to lysate. Fluorescence (360nm ex /  
536 460nm em) was measured on a Bio-Tek Synergy 2 microplate reader.

537

#### 538 *RNA interference*

539 siRNAs were reverse transfected using RNAiMAX (ThermoFisher) according to the manufacturer's  
540 instructions. All constructs are siGENOME SMARTpool siRNAs (GE Healthcare Dharmacon, Lafayette,  
541 CO, USA): Non-targeting pool #2 (D-001206-14-05), Human *WNT4* (M-008659-03-0005), Human  
542 *PORCN* (M-009613-00) and Human *WLS* (M-018728-01-0005). Details regarding validation of the  
543 specific effects of the *WNT4* siRNA pool are previously described (41).

544

#### 545 *Gene expression analyses*

546 RNA extractions were performed using the RNeasy Mini kit (Qiagen, Venlo, Netherlands); mRNA was  
547 converted to cDNA on an Eppendorf Mastercycler Pro (Eppendorf, Hamburg, Germany) and using  
548 Promega reagents: Oligo (dT)<sub>15</sub> primer (cat# C110A), Random Primers (cat# C118A), GoScript 5x  
549 Reaction Buffer (cat# A500D), 25mM MgCl<sub>2</sub> (cat# A351H), 10mM dNTPs (cat# U1511), RNasin Plus  
550 RNase Inhibitor (cat# N261B) and GoScript Reverse Transcriptase (cat# A501D). qPCR reactions were  
551 performed with PowerUp SYBR Green Master Mix (Life Technologies, cat # 100029284) on a  
552 QuantStudio 6 Flex Real-Time PCR system. Expression data were normalized to *RPLP0*. The following  
553 primers were used: *RPLP0*, Forward – CAGCATCTACAACCCTGAAG, Reverse –  
554 GACAGACACTGGCAACATT; *WNT4*, Forward – GCCATTGAGGAGTGCCAGTA, Reverse –  
555 CCACACCTGCCGAAGAGATG; *WNT3A*, Forward – ATGGTGTCTCGGGAGTT, Reverse –  
556 TGGCACTTGCACTTGAG; *PORCN*, Forward – ACCATCCTCATCTACCTACTC, Reverse –

557 CCTTCATGGCCACAATCA; *AXIN2*: Forward – CTCTGGAGCTGTTTCTTACTG, Reverse –  
558 CTCTGGAGCTGTTTCTTACTG.

559

### 560 *Immunoblotting*

561 Whole-cell lysates were obtained by incubating cells in lysis buffer (1% Triton X-100, 50mM HEPES pH  
562 7.4, 140mM NaCl, 1.5mM MgCl<sub>2</sub>, 1mM EGTA, 10% glycerol; supplemented with Roche  
563 protease/phosphatase inhibitor cocktail (Sigma-Aldrich, St. Louis, MO, USA)) for 30min on ice. Cells  
564 were centrifuged at 16000xg for 15min at 4C and the resulting supernatant was collected for analysis.  
565 Protein concentration was measured using the Pierce BCA Protein Assay Kit (#23225). Standard methods  
566 were used to perform SDS-PAGE. Proteins were transferred onto PVDF membranes. Antibodies were  
567 used according to manufacturer's recommendations: WNT4 (R&D, MAB4751, clone# 55025, 1:1,000),  
568 WNT3A (R&D, MAB13242, clone# 217804.2R, 1:1,000), DVL2 (Cell Signaling Technology, Danvers,  
569 MA, USA, cat#3216, 1:2,000), DVL3 (Cell Signaling, 3218, 1:2,000), pLRP6 (s1490, Cell Signaling,  
570 2568, 1:2,000), LRP6 (Cell Signaling, 2560, clone# C5C7, 1:2,000), Vinculin (Cell Signaling, cat#  
571 13901S 1:10,000) and V5 (Novus Biologicals, Centennial, CO, USA, NB100-62264, clone #SV5-PK1,  
572 1:2,500). Specificity of WNT4 antibody was validated using siWNT4 (Figure S3) and the recognition of  
573 recombinant WNT4 compared to endogenous and overexpressed WNT4 (Figure 4E-F). Secondary  
574 antibodies were used according to manufacturer's instruction and were obtained from Jackson  
575 ImmunoResearch Laboratories (West Grove, PA, USA): Goat Anti-Mouse IgG (cat # 115-035-068), Goat  
576 Anti-Rabbit IgG (cat# 111-035-045) and Goat Anti-Rat IgG (cat# 112-035-062). All secondary antibodies  
577 were used at a dilution of 1:10,000. Chemiluminescence was used to detect antibodies and either film or  
578 the LI-COR c-Digit (LI-COR Biosciences, Lincoln, NE, USA) was used to develop the immunoblots. Of  
579 note, WNT4 MAB4751 detects a prominent non-specific band at ~50kD in immunoblots from cell  
580 lysates. This non-specific target largely precludes detection of WNT4, but cutting immunoblot  
581 membranes immediately below a 50kD ladder marker prevents this issue. This non-specific band was not  
582 detected in WNT4 immunoblots from conditioned medium. Similarly, in immunoblots of conditioned  
583 medium WNT3A MAB13242 detects a prominent non-specific band at ~60kD that precludes detection of  
584 secreted WNT3A; cutting membranes above a 50kD ladder marker prevents this issue. This non-specific  
585 band was not detected in WNT3A immunoblots from cell lysates.

586

### 587 *Protein Transfection*

588 HT1080 wild type cells were seeded into a 24-well plate at 100,000 cell/well. 24hrs later, protein  
589 transfection was performed using the Pierce Protein Transfection Reagent (Thermo Fisher Scientific, Cat#  
590 89850). The FITC antibody control was provided with the transfection reagent. All protein transfections

591 were carried out per the manufacturer's instructions, with protein concentrations of 4ug/ml (1ug/24-well).

592 Cells were harvested for whole cell lysate as above 4hr after transfection.

593

594

595 *Statistical Considerations*

596 Prism was used for all graphical representation and statistical analyses. All western blot figures are  
597 representative of at least two to three independent experiments.

598

599 *Software*

600 Prism (GraphPad Software, San Diego, CA, USA, version 7.02) and Image Studio (LI-COR Biosciences,  
601 Lincoln, NE, USA, version 5.2) were used to obtain and analyze that data presented in this manuscript.

602

603 **Competing interests**

604 The authors have nothing to disclose.

605

606 **Funding**

607 This work was supported by R00 CA193734 (MJS) and R00 CA194318 (BGB) from the National  
608 Institutes of Health, by a grant from the Cancer League of Colorado, Inc (MJS), and by T32 GM007635  
609 (EKB).

610

611 **Data availability**

612 Data associated with experiments herein will be available at an Open Science Framework repository (64)  
613 (<https://doi.org/10.17605/OSF.IO/7X8NG>).

614 **References**

- 615  
616 1. Nusse R, Clevers H. 2017. Wnt/ $\beta$ -Catenin Signaling, Disease, and Emerging Therapeutic  
617 Modalities. *Cell* 169:985–999.
- 618 2. Madan B, Ke Z, Harmston N, Ho SY, Frois AO, Alam J, Jeyaraj DA, Pendharkar V, Ghosh K,  
619 Virshup IH, Manoharan V, Ong EHQ, Sangthongpitag K, Hill J, Petretto E, Keller TH, Lee MA,  
620 Matter A, Virshup DM. 2016. Wnt addiction of genetically defined cancers reversed by PORCN  
621 inhibition. *Oncogene* 35:2197–207.
- 622 3. Liu J, Pan S, Hsieh MH, Ng N, Sun F, Wang T, Kasibhatla S, Schuller AG, Li AG, Cheng D, Li J,  
623 Tompkins C, Pferdekamper A, Steffy A, Cheng J, Kowal C, Phung V, Guo G, Wang Y, Graham  
624 MP, Flynn S, Brenner JC, Li C, Villarroel MC, Schultz PG, Wu X, McNamara P, Sellers WR,  
625 Petruzzelli L, Boral AL, Seidel HM, McLaughlin ME, Che J, Carey TE, Vanasse G, Harris JL.  
626 2013. Targeting Wnt-driven cancer through the inhibition of Porcupine by LGK974. *Proc Natl*  
627 *Acad Sci U S A* 110:20224–9.
- 628 4. van Amerongen R. 2012. Alternative Wnt pathways and receptors. *Cold Spring Harb Perspect*  
629 *Biol* 4:a007914–a007914.
- 630 5. Loh KM, van Amerongen R, Nusse R. 2016. Generating Cellular Diversity and Spatial Form: Wnt  
631 Signaling and the Evolution of Multicellular Animals. *Dev Cell* 38:643–55.
- 632 6. Brisken C, Hess K, Jeitziner R. 2015. Progesterone and Overlooked Endocrine Pathways in Breast  
633 Cancer Pathogenesis. *Endocrinology* 156:3442–50.
- 634 7. Miranda M, Galli LM, Enriquez M, Szabo LA, Gao X, Hannoush RN, Burrus LW. 2014.  
635 Identification of the WNT1 residues required for palmitoylation by Porcupine. *FEBS Lett*  
636 588:4815–24.
- 637 8. Najdi R, Proffitt K, Sprowl S, Kaur S, Yu J, Covey TM, Virshup DM, Waterman ML. 2012. A  
638 uniform human Wnt expression library reveals a shared secretory pathway and unique signaling  
639 activities. *Differentiation* 84:203–13.
- 640 9. Takada R, Satomi Y, Kurata T, Ueno N, Norioka S, Kondoh H, Takao T. 2006. Monounsaturated  
641 Fatty Acid Modification of Wnt Protein : Its Role in Wnt Secretion 791–801.
- 642 10. Bänziger C, Soldini D, Schütt C, Zipperlen P, Hausmann G, Basler K. 2006. Wntless, a conserved  
643 membrane protein dedicated to the secretion of Wnt proteins from signaling cells. *Cell* 125:509–  
644 22.
- 645 11. Coombs GS, Yu J, Canning CA, Veltri CA, Covey TM, Cheong JK, Utomo V, Banerjee N, Zhang  
646 ZH, Jadulco RC, Concepcion GP, Bugni TS, Harper MK, Mihalek I, Jones CM, Ireland CM,  
647 Virshup DM. 2010. WLS-dependent secretion of WNT3A requires Ser209 acylation and vacuolar  
648 acidification. *J Cell Sci* 123:3357–67.
- 649 12. Proffitt KD, Madan B, Ke Z, Pendharkar V, Ding L, Lee MA, Hannoush RN, Virshup DM. 2013.  
650 Pharmacological inhibition of the Wnt acyltransferase PORCN prevents growth of WNT-driven  
651 mammary cancer. *Cancer Res* 73:502–7.
- 652 13. Hayashi M, Baker A, Goldstein SD, Albert CM, Jackson KW, McCarty G, Kahlert UD, Loeb DM.  
653 2017. Inhibition of porcupine prolongs metastasis free survival in a mouse xenograft model of  
654 Ewing sarcoma. *Oncotarget* 8:78265–78276.
- 655 14. Agarwal P, Zhang B, Ho Y, Cook A, Li L, Mikhail FM, Wang Y, McLaughlin ME, Bhatia R.  
656 2017. Enhanced targeting of CML stem and progenitor cells by inhibition of porcupine  
657 acyltransferase in combination with TKI. *Blood* 129:1008–1020.
- 658 15. Li Q, Kannan A, Das A, Demayo FJ, Hornsby PJ, Young SL, Taylor RN, Bagchi MK, Bagchi IC.  
659 2013. WNT4 acts downstream of BMP2 and functions via  $\beta$ -catenin signaling pathway to regulate

- 660 human endometrial stromal cell differentiation. *Endocrinology* 154:446–57.
- 661 16. Itäranta P, Chi L, Seppänen T, Niku M, Tuukkanen J, Peltoketo H, Vainio S. 2006. Wnt-4  
662 signaling is involved in the control of smooth muscle cell fate via Bmp-4 in the medullary stroma  
663 of the developing kidney. *Dev Biol* 293:473–83.
- 664 17. Tomizuka K, Horikoshi K, Kitada R, Sugawara Y, Iba Y, Kojima A, Yoshitome A, Yamawaki K,  
665 Amagai M, Inoue A, Oshima T, Kakitani M. 2008. R-spondin1 plays an essential role in ovarian  
666 development through positively regulating Wnt-4 signaling. *Hum Mol Genet* 17:1278–91.
- 667 18. Chang J, Sonoyama W, Wang Z, Jin Q, Zhang C, Krebsbach PH, Giannobile W, Shi S, Wang C-  
668 Y. 2007. Noncanonical Wnt-4 signaling enhances bone regeneration of mesenchymal stem cells in  
669 craniofacial defects through activation of p38 MAPK. *J Biol Chem* 282:30938–48.
- 670 19. Prunskaitė-Hyyryläinen R, Skovorodkin I, Xu Q, Miinalainen I, Shan J, Vainio SJ. 2016. Wnt4  
671 coordinates directional cell migration and extension of the Müllerian duct essential for ontogenesis  
672 of the female reproductive tract. *Hum Mol Genet* 25:1059–73.
- 673 20. Strohlic L, Falk J, Goillot E, Sigoillot S, Bourgeois F, Delers P, Rouvière J, Swain A, Castellani  
674 V, Schaeffer L, Legay C. 2012. Wnt4 participates in the formation of vertebrate neuromuscular  
675 junction. *PLoS One* 7:e29976.
- 676 21. Caprioli A, Villasenor A, Wylie LA, Braitsch C, Marty-Santos L, Barry D, Karner CM, Fu S,  
677 Meadows SM, Carroll TJ, Cleaver O. 2015. Wnt4 is essential to normal mammalian lung  
678 development. *Dev Biol* 406:222–34.
- 679 22. Yu B, Chang J, Liu Y, Li J, Kevork K, Al-Hezaimi K, Graves DT, Park N-H, Wang C-Y. 2014.  
680 Wnt4 signaling prevents skeletal aging and inflammation by inhibiting nuclear factor- $\kappa$ B. *Nat Med*  
681 20:1009–17.
- 682 23. Bernard P, Harley VR. 2007. Wnt4 action in gonadal development and sex determination. *Int J*  
683 *Biochem Cell Biol* 39:31–43.
- 684 24. Philibert P, Biason-Lauber A, Rouzier R, Pienkowski C, Paris F, Konrad D, Schoenle E, Sultan C.  
685 2008. Identification and functional analysis of a new WNT4 gene mutation among 28 adolescent  
686 girls with primary amenorrhea and müllerian duct abnormalities: a French collaborative study. *J*  
687 *Clin Endocrinol Metab* 93:895–900.
- 688 25. Vainio S, Heikkilä M, Kispert A, Chin N, McMahon AP. 1999. Female development in mammals  
689 is regulated by Wnt-4 signalling. *Nature* 397:405–9.
- 690 26. Biason-Lauber A, De Filippo G, Konrad D, Scarano G, Nazzaro A, Schoenle EJ. 2007. WNT4  
691 deficiency--a clinical phenotype distinct from the classic Mayer-Rokitansky-Kuster-Hauser  
692 syndrome: a case report. *Hum Reprod* 22:224–9.
- 693 27. Powell JE, Fung JN, Shakhbazov K, Sapkota Y, Cloonan N, Hemani G, Hillman KM, Kaufmann  
694 S, Luong HT, Bowdler L, Painter JN, Holdsworth-Carson SJ, Visscher PM, Dinger ME, Healey  
695 M, Nyholt DR, French JD, Edwards SL, Rogers PAW, Montgomery GW. 2016. Endometriosis  
696 risk alleles at 1p36.12 act through inverse regulation of CDC42 and LINC00339. *Hum Mol Genet*  
697 25:5046–5058.
- 698 28. Rahmioglu N, Macgregor S, Drong AW, Hedman ÅK, Harris HR, Randall JC, Prokopenko I,  
699 Nyholt DR, Morris AP, Montgomery GW, Missmer SA, Lindgren CM, Zondervan KT, Collins  
700 FS, International Endogene Consortium (IEC) TGC, Nyholt DR, Morris AP, Montgomery GW,  
701 Missmer SA, Lindgren CM, Zondervan KT. 2015. Genome-wide enrichment analysis between  
702 endometriosis and obesity-related traits reveals novel susceptibility loci. *Hum Mol Genet*  
703 24:1185–1199.
- 704 29. Mafra F, Catto M, Bianco B, Barbosa CP, Christofolini D. 2015. Association of WNT4  
705 polymorphisms with endometriosis in infertile patients. *J Assist Reprod Genet* 32:1359–64.



- 706 30. Zhang G, Feenstra B, Bacelis J, Liu X, Muglia LJM, Juodakis J, Miller DE, Litterman N,  
707 Jiang P-P, Russell L, Hinds DA, Hu Y, Weirauch MT, Chen X, Chavan AR, Wagner GP, Pavličev  
708 M, Nnamani MC, Maziarz J, Karjalainen MK, Rämetsä M, Sengpiel V, Geller F, Boyd HA, Palotie  
709 A, Momany A, Bedell B, Ryckman KK, Huusko JM, Forney CR, Kottyan LC, Hallman M,  
710 Teramo K, Nohr EA, Davey Smith G, Melbye M, Jacobsson B, Muglia LJM. 2017. Genetic  
711 Associations with Gestational Duration and Spontaneous Preterm Birth. *N Engl J Med* 377:1156–  
712 1167.
- 713 31. Zmuda JM, Yerges-Armstrong LM, Moffett SP, Klei L, Kammerer CM, Roeder K, Cauley JA,  
714 Kuipers A, Ensrud KE, Nestlerode CS, Hoffman AR, Lewis CE, Lang TF, Barrett-Connor E,  
715 Ferrell RE, Orwoll ES, Osteoporotic Fractures in Men (MrOS) Study Group. 2011. Genetic  
716 analysis of vertebral trabecular bone density and cross-sectional area in older men. *Osteoporos Int*  
717 22:1079–90.
- 718 32. Zheng Y, Wang C, Zhang H, Shao C, Gao L-H, Li S-S, Yu W-J, He J-W, Fu W-Z, Hu Y-Q, Li M,  
719 Liu Y-J, Zhang Z-L. 2016. Polymorphisms in Wnt signaling pathway genes are associated with  
720 peak bone mineral density, lean mass, and fat mass in Chinese male nuclear families. *Osteoporos*  
721 *Int* 27:1805–1815.
- 722 33. Kuchenbaecker KB, Ramus SJ, Tyrer J, Lee A, Shen HC, Beesley J, Lawrenson K, McGuffog L,  
723 Healey S, Lee JM, Spindler TJ, Lin YG, Pejovic T, Bean Y, Li Q, Coetzee S, Hazelett D, Miron  
724 A, Southey M, Terry MB, Goldgar DE, Buys SS, Janavicius R, Dorfling CM, Van Rensburg EJ,  
725 Neuhausen SL, Ding YC, Hansen TVO, Jønson L, Gerdes AM, Ejlertsen B, Barrowdale D, Dennis  
726 J, Benitez J, Osorio A, Garcia MJ, Komenaka I, Weitzel JN, Ganschow P, Peterlongo P, Bernard  
727 L, Viel A, Bonanni B, Peissel B, Manoukian S, Radice P, Papi L, Ottini L, Fostira F,  
728 Konstantopoulou I, Garber J, Frost D, Perkins J, Platte R, Ellis S, Godwin AK, Schmutzler RK,  
729 Meindl A, Engel C, Sutter C, Sinilnikova OM, Damiola F, Mazoyer S, Stoppa-Lyonnet D, Claes  
730 K, De Leeneer K, Kirk J, Rodriguez GC, Piedmonte M, O'Malley DM, De La Hoya M, Caldes T,  
731 Aittomäki K, Nevanlinna H, Margriet JC, Rookus MA, Oosterwijk JC, Tihomirova L, Tung N,  
732 Hamann U, Isacs C, Tischkowitz M, Imyanitov EN, Caligo MA, Campbell IG, Hogervorst FBL,  
733 Olah E, Diez O, Blanco I, Brunet J, Lazaro C, Pujana MA, Jakubowska A, Gronwald J, Lubinski  
734 J, Sukiennicki G, Barkardottir RB, Plante M, Simard J, Soucy P, Montagna M, Tognazzo S,  
735 Teixeira MR, Pankratz VS, Wang X, Lindor N, Szabo CI, Kauff N, Vijai J, Aghajanian CA,  
736 Pfeiler G, Berger A, Singer CF, Tea MK, Phelan CM, Greene MH, Mai PL, Rennert G, Mulligan  
737 AM, Tchatchou S, Andrulis IL, Glendon G, Toland AE, Jensen UB, Kruse TA, Thomassen M,  
738 Bojesen A, Zidan J, Friedman E, Laitman Y, Soller M, Liljegren A, Arver B, Einbeigi Z,  
739 Stenmark-Askmal M, Olopade OI, Nussbaum RL, Rebbeck TR, Nathanson KL, Domchek SM,  
740 Lu KH, Karlan BY, Walsh C, Lester J, Hein A, Ekici AB, Beckmann MW, Fasching PA,  
741 Lambrechts D, Van Nieuwenhuysen E, Vergote I, Lambrechts S, Dicks E, Doherty JA, Wicklund  
742 KG, Rossing MA, Rudolph A, Chang-Claude J, Wang-Gohrke S, Eilber U, Moysich KB, Odunsi  
743 K, Sucheston L, Lele S, Wilkens LR, Goodman MT, Thompson PJ, Shvetsov YB, Runnebaum IB,  
744 Dürst M, Hillemanns P, Dörk T, Antonenkova N, Bogdanova N, Leminen A, Pelttari LM, Butzow  
745 R, Modugno F, Kelley JL, Edwards RP, Ness RB, Du Bois A, Heitz F, Schwaab I, Harter P,  
746 Matsuo K, Hosono S, Orsulic S, Jensen A, Kjaer SK, Hogdall E, Hasmad HN, Noor Azmi MA,  
747 Teo SH, Woo YL, Fridley BL, Goode EL, Cunningham JM, Vierkant RA, Bruinsma F, Giles GG,  
748 Liang D, Hildebrandt MAT, Wu X, Levine DA, Bisogna M, Berchuck A, Iversen ES, Schildkraut  
749 JM, Concannon P, Weber RP, Cramer DW, Terry KL, Poole EM, Tworoger SS, Bandera E V.,  
750 Orlow I, Olson SH, Krakstad C, Salvesen HB, Tangen IL, Bjorge L, Van Altena AM, Aben KKH,  
751 Kiemeny LA, Massuger LFAG, Kellar M, Brooks-Wilson A, Kelemen LE, Cook LS, Le ND,  
752 Cybulski C, Yang H, Lissowska J, Brinton LA, Wentzensen N, Hogdall C, Lundvall L,  
753 Nedergaard L, Baker H, Song H, Eccles D, McNeish I, Paul J, Carty K, Siddiqui N, Glasspool R,  
754 Whittemore AS, Rothstein JH, McGuire V, Sieh W, Ji BT, Zheng W, Shu XO, Gao YT, Rosen B,  
755 Risch HA, McLaughlin JR, Narod SA, Monteiro AN, Chen A, Lin HY, Permuth-Wey J, Sellers



- 756 TA, Tsai YY, Chen Z, Ziogas A, Anton-Culver H, Gentry-Maharaj A, Menon U, Harrington P,  
757 Lee AW, Wu AH, Pearce CL, Coetzee G, Pike MC, Dansonka-Mieszkowska A, Timorek A,  
758 Rzepecka IK, Kupryjanczyk J, Freedman M, Noushmehr H, Easton DF, Offit K, Couch FJ,  
759 Gayther S, Pharoah PP, Antoniou AC, Chenevix-Trench G. 2015. Identification of six new  
760 susceptibility loci for invasive epithelial ovarian cancer. *Nat Genet* 47:164–171.
- 761 34. Brisken C, Heineman A, Chavarría T, Elenbaas B, Tan J, Dey SK, McMahon JA, McMahon AP,  
762 Weinberg RA. 2000. Essential function of Wnt-4 in mammary gland development downstream of  
763 progesterone signaling. *Genes Dev* 14:650–4.
- 764 35. Alexander CM, Goel S, Fakhraldeen S a., Kim S. 2012. Wnt signaling in mammary glands: plastic  
765 cell fates and combinatorial signaling. *Cold Spring Harb Perspect Biol* 4.
- 766 36. Rajaram RD, Buric D, Caikovski M, Ayyanan A, Rougemont J, Shan J, Vainio SJ, Yalcin-Ozuysal  
767 O, Brisken C. 2015. Progesterone and Wnt4 control mammary stem cells via myoepithelial  
768 crosstalk. *EMBO J* 34:641–652.
- 769 37. Joshi PA, Jackson HW, Beristain AG, Di Grappa MA, Mote PA, Clarke CL, Stingl J, Waterhouse  
770 PD, Khokha R. 2010. Progesterone induces adult mammary stem cell expansion. *Nature* 465:803–  
771 807.
- 772 38. Meier-Abt F, Milani E, Roloff T, Brinkhaus H, Duss S, Meyer DS, Klebba I, Balwierz PJ, van  
773 Nimwegen E, Bentires-Alj M. 2013. Parity induces differentiation and reduces Wnt/Notch  
774 signaling ratio and proliferation potential of basal stem/progenitor cells isolated from mouse  
775 mammary epithelium. *Breast Cancer Res* 15:R36.
- 776 39. Kim YC, Clark RJ, Pelegri F, Alexander CM. 2009. Wnt4 is not sufficient to induce  
777 lobuloalveolar mammary development. *BMC Dev Biol* 9:55.
- 778 40. Sikora MJ, Cooper KL, Bahreini A, Luthra S, Wang G, Chandran UR, Davidson NE, Dabbs DJ,  
779 Welm AL, Oesterreich S. 2014. Invasive lobular carcinoma cell lines are characterized by unique  
780 estrogen-mediated gene expression patterns and altered tamoxifen response. *Cancer Res* 74:1463–  
781 74.
- 782 41. Sikora MJ, Jacobsen BM, Levine K, Chen J, Davidson NE, Lee A V, Alexander CM, Oesterreich  
783 S. 2016. WNT4 mediates estrogen receptor signaling and endocrine resistance in invasive lobular  
784 carcinoma cell lines. *Breast Cancer Res* 18:92.
- 785 42. Ciriello G, Gatz ML, Beck AH, Wilkerson MD, Rhee SK, Pastore A, Zhang H, McLellan M, Yau  
786 C, Kandoth C, Bowlby R, Shen H, Hayat S, Fieldhouse R, Lester SC, Tse GMK, Factor RE,  
787 Collins LC, Allison KH, Chen Y-Y, Jensen K, Johnson NB, Oesterreich S, Mills GB, Cherniack  
788 AD, Robertson G, Benz C, Sander C, Laird PW, Hoadley KA, King TA, TCGA Research  
789 Network, Perou CM. 2015. Comprehensive Molecular Portraits of Invasive Lobular Breast  
790 Cancer. *Cell* 163:506–519.
- 791 43. Proffitt KD, Virshup DM. 2012. Precise regulation of porcupine activity is required for  
792 physiological Wnt signaling. *J Biol Chem* 287:34167–78.
- 793 44. Glaeser K, Urban M, Fenech E, Voloshanenko O, Kranz D, Lari F, Christianson JC, Boutros M.  
794 2018. ERAD-dependent control of the Wnt secretory factor Evi. *EMBO J* 37:e97311.
- 795 45. Willert K, Nusse R. 2012. Wnt proteins. *Cold Spring Harb Perspect Biol* 4:a007864.
- 796 46. Kispert A, Vainio S, McMahon AP. 1998. Wnt-4 is a mesenchymal signal for epithelial  
797 transformation of metanephric mesenchyme in the developing kidney. *Development* 125:4225–34.
- 798 47. Galli LM, Santana F, Apollon C, Szabo LA, Ngo K, Burrus LW. 2018. Direct visualization of the  
799 Wntless-induced redistribution of WNT1 in developing chick embryos. *Dev Biol* 439:53–64.
- 800 48. Rawadi G, Vayssière B, Dunn F, Baron R, Roman-Roman S. 2003. BMP-2 controls alkaline  
801 phosphatase expression and osteoblast mineralization by a Wnt autocrine loop. *J Bone Miner Res*

- 802 18:1842–53.
- 803 49. Ching W, Hang HC, Nusse R. 2008. Lipid-independent secretion of a *Drosophila* Wnt protein. *J*  
804 *Biol Chem* 283:17092–8.
- 805 50. Richards MH, Seaton MS, Wallace J, Al-Harhi L. 2014. Porcupine is not required for the  
806 production of the majority of Wnts from primary human astrocytes and CD8+ T cells. *PLoS One*  
807 9:e92159.
- 808 51. Galli LM, Zebarjadi N, Li L, Lingappa VR, Burrus LW. 2016. Divergent effects of Porcupine and  
809 Wntless on WNT1 trafficking, secretion, and signaling. *Exp Cell Res* 347:171–83.
- 810 52. Chen Q, Takada R, Takada S. 2012. Loss of Porcupine impairs convergent extension during  
811 gastrulation in zebrafish. *J Cell Sci* 125:2224–34.
- 812 53. Kurita Y, Ohki T, Soejima E, Yuan X, Kakino S, Wada N, Hashinaga T, Nakayama H, Tani J,  
813 Tajiri Y, Hiromatsu Y, Yamada K, Nomura M. 2019. A High-Fat/High-Sucrose Diet Induces  
814 WNT4 Expression in Mouse Pancreatic  $\beta$ -cells. *Kurume Med J* 1–8.
- 815 54. Yamamoto H, Awada C, Hanaki H, Sakane H, Tsujimoto I, Takahashi Y, Takao T, Kikuchi A.  
816 2013. The apical and basolateral secretion of Wnt11 and Wnt3a in polarized epithelial cells is  
817 regulated by different mechanisms. *J Cell Sci* 126:2931–43.
- 818 55. Lyons JP, Mueller UW, Ji H, Everett C, Fang X, Hsieh J-C, Barth AM, McCrea PD. 2004. Wnt-4  
819 activates the canonical beta-catenin-mediated Wnt pathway and binds Frizzled-6 CRD: functional  
820 implications of Wnt/beta-catenin activity in kidney epithelial cells. *Exp Cell Res* 298:369–87.
- 821 56. Jordan BK, Shen JH-C, Olaso R, Ingraham HA, Vilain E. 2003. Wnt4 overexpression disrupts  
822 normal testicular vasculature and inhibits testosterone synthesis by repressing steroidogenic factor  
823 1/beta-catenin synergy. *Proc Natl Acad Sci U S A* 100:10866–71.
- 824 57. Bernard P, Fleming A, Lacombe A, Harley VR, Vilain E. 2008. Wnt4 inhibits beta-catenin/TCF  
825 signalling by redirecting beta-catenin to the cell membrane. *Biol Cell* 100:167–77.
- 826 58. Louis I, Heinonen KM, Chagraoui J, Vainio S, Sauvageau G, Perreault C. 2008. The signaling  
827 protein Wnt4 enhances thymopoiesis and expands multipotent hematopoietic progenitors through  
828 beta-catenin-independent signaling. *Immunity* 29:57–67.
- 829 59. Kurayoshi M, Yamamoto H, Izumi S, Kikuchi A. 2007. Post-translational palmitoylation and  
830 glycosylation of Wnt-5a are necessary for its signalling. *Biochem J* 402:515–23.
- 831 60. Schackmann RCJ, van Amersfoort M, Haarhuis JHI, Vlug EJ, Halim VA, Roodhart JML, Vermaat  
832 JS, Voest EE, van der Groep P, van Diest PJ, Jonkers J, Derksen PWB. 2011. Cytosolic p120-  
833 catenin regulates growth of metastatic lobular carcinoma through Rock1-mediated anoikis  
834 resistance. *J Clin Invest* 121:3176–3188.
- 835 61. Yamamoto TM, McMellen A, Watson ZL, Aguilera J, Sikora MJ, Ferguson R, Nurmammedov E,  
836 Thakar T, George-Lucian M, Kim H, Cittelly DM, Wilson H, Behbakht K, Bitler BG. 2018.  
837 Targeting Wnt Signaling To Overcome PARP Inhibitor Resistance. *bioRxiv* 378463 [Pre-print].
- 838 62. Short B. 2017. The signal hypothesis matures with age. *J Cell Biol* 216:1207–1207.
- 839 63. Nakamura K, Shirai T, Morishita S, Uchida S, Saeki-Miura K, Makishima F. 1999. p38 mitogen-  
840 activated protein kinase functionally contributes to chondrogenesis induced by  
841 growth/differentiation factor-5 in ATDC5 cells. *Exp Cell Res* 250:351–63.
- 842 64. Sikora MJ, Jabobsen BM, O'Connor DP, Riggins RB, Stires H, Oesterreich S. 2017. ILC-CORE  
843 (Collaboration, Openness, REproducibility). *Open Sci Framew* 19 Sept.

844

845

846 **Table 1 – Model Systems**  
847

| Cell Line     | Tissue Type<br>(WNT4-responsive tissue) | WNT Over-expression<br>(Wnt OE) |      | PORCN Activity |
|---------------|-----------------------------------------|---------------------------------|------|----------------|
|               |                                         | WNT3A                           | WNT4 |                |
| MM134         | ILC/Breast Cancer<br>(Mammary Gland)    | -                               | -    | Normal         |
| MM134:W3      |                                         | Yes                             | -    | Normal         |
| MM134:W4      |                                         | -                               | Yes  | Normal         |
| HT1080        | Fibrosarcoma (Bone)                     | -                               | -    | Normal         |
| HT1080:W3     |                                         | Yes                             | -    | Normal         |
| HT1080:W4     |                                         | -                               | Yes  | Normal         |
| HT1080-PKO    | Fibrosarcoma (Bone)                     | -                               | -    | Inactive       |
| HT1080-PKO:W3 |                                         | Yes                             | -    | Inactive       |
| HT1080-PKO:W4 |                                         | -                               | Yes  | Inactive       |
| SUM44PE       | ILC/Breast Cancer<br>(Mammary Gland)    | (as above)                      |      | Normal         |
| HCC1428       | Breast Cancer<br>(Mammary Gland)        | (as above)                      |      | Normal         |
| PEO1          | Ovarian Cancer<br>(Ovary)               | (as above)                      |      | Normal         |

848

849

850

851 **List of Abbreviations**

852

853 AP - Alkaline Phosphatase

854 AXIN2 - Axin related protein 2

855 CDH1 - E-cadherin

856 CM - Conditioned Media

857 DVL - Disheveled

858 Fulv - Fulvestrant

859 FZD - Frizzled

860 ILC - Invasive Lobular Carcinoma

861 LRP - Lipoprotein receptor-related protein

862 PKO - Porcupine knockout

863 PORCN - O-acyltransferase Porcupine

864 PORCNi - Porcupine inhibitor

865 rWNT - Recombinant WNT

866 sWNT - Secreted WNT

867 WLS - Wntless

868 WNT - Wingless/Integrated

869

870

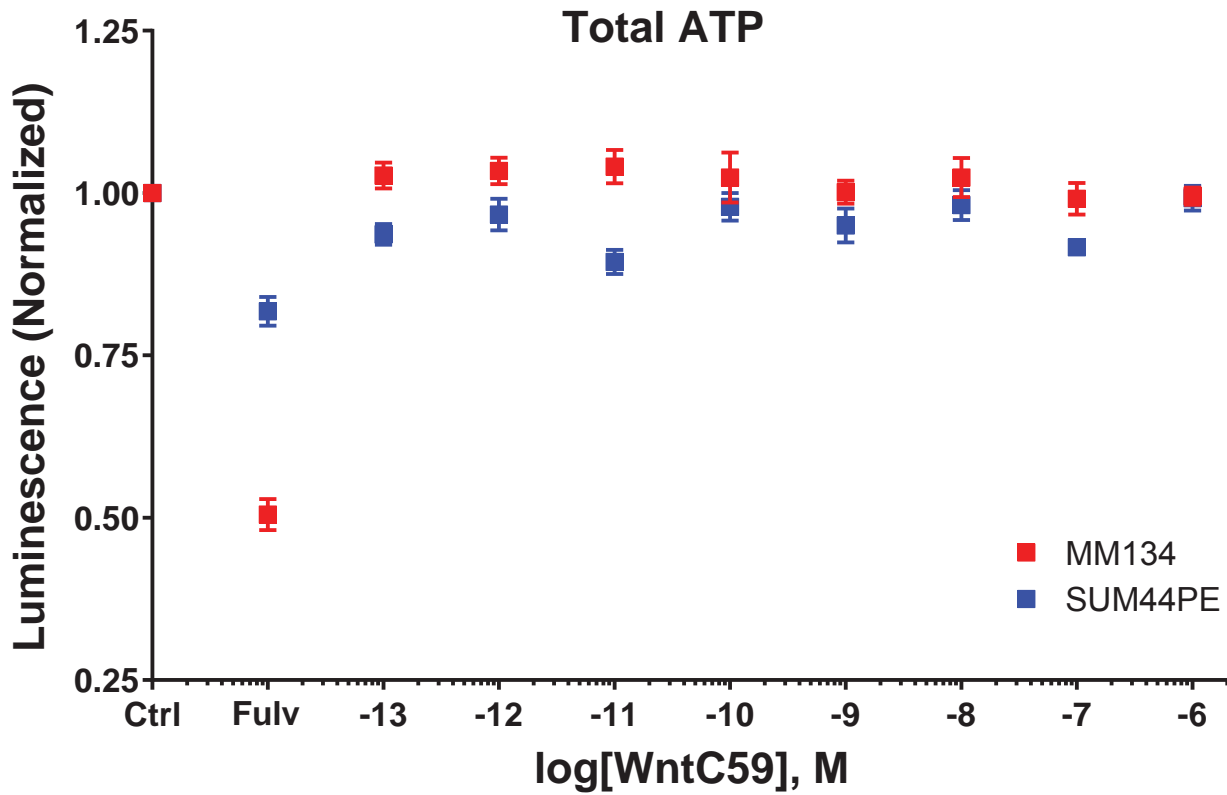

**Supplemental Figure 1. PORCNI (WntC59) does not impact ILC growth.**

MM134 and SUM44PE were plated and 24hrs later started treatment with either anti-estrogen fulvestrant (Fulv) or increasing concentrations of WntC59. At the timecourse completion of either 5 or 7 days, total ATP was measured using Promega Cell-Titer Glo. Points represent the mean of 6 biological replicates  $\pm$  SD.

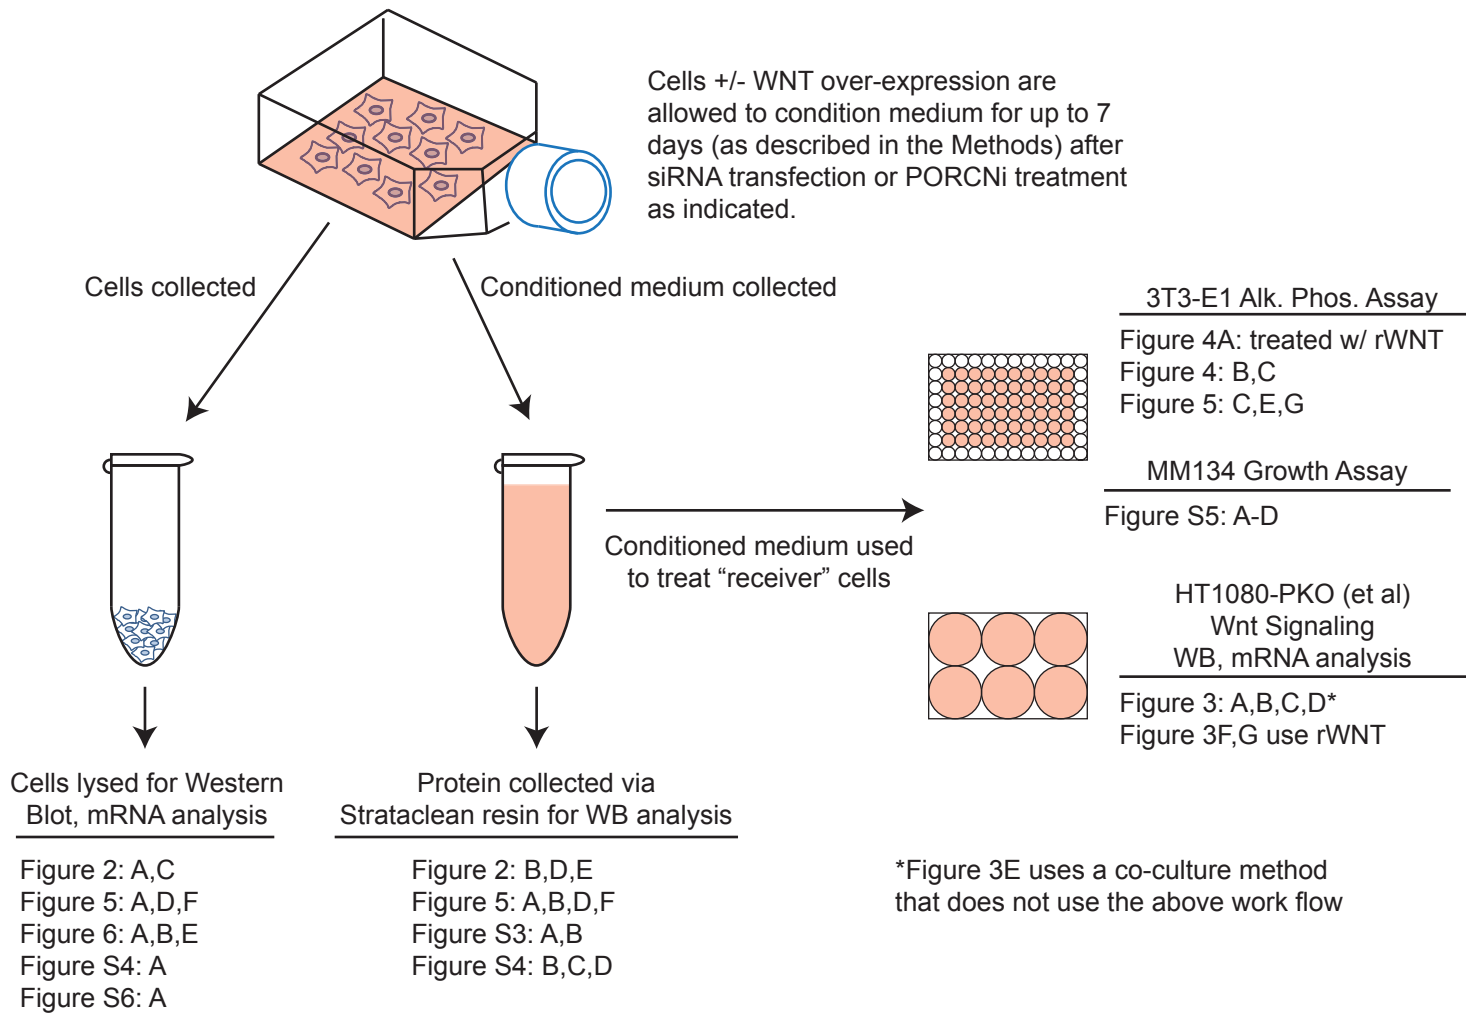

### Supplemental Figure 2. Experimental Workflow for Assessing Wnt Secretion and Function.

Diagram of the workflow for experiments aimed at assessing the ability of Wnt proteins to be secreted and their functionality. Experimental endpoints are labeled with corresponding figures.

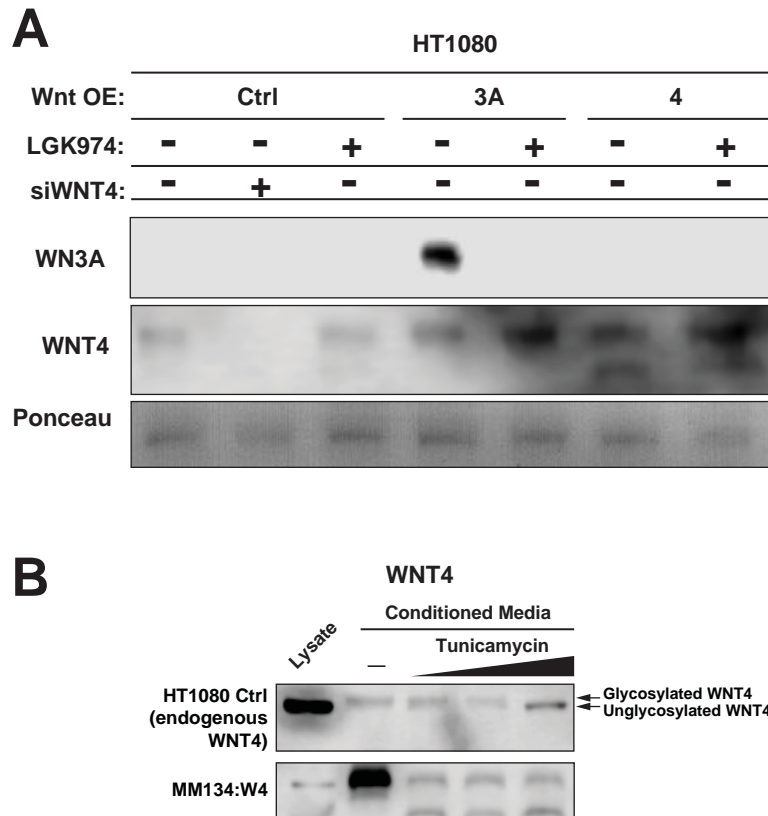

**Supplemental Figure 3. WNT4 secretion is PORCN-independent, but secreted WNT4 is post-translationally modified.**

(A), HT1080 cells were reverse transfected with siWNT4. 24hrs later media was changed and cells were treated with or without LGK974 (10nM). Conditioned media (CM) was harvested 5 days later and total protein was collected from immunoblotting (as described in the Methods and Materials) for WNT3A or WNT4. (B), Conditioned media was harvested from either HT1080:WT or MM134:Wnt4 over-expressing cells after treatment (3 or 5 days respectively) with increasing concentrations of tunicamycin (0.5uM, 1uM or 10uM). WNT4 presence was detected from untreated whole cell lysate and conditioned media.



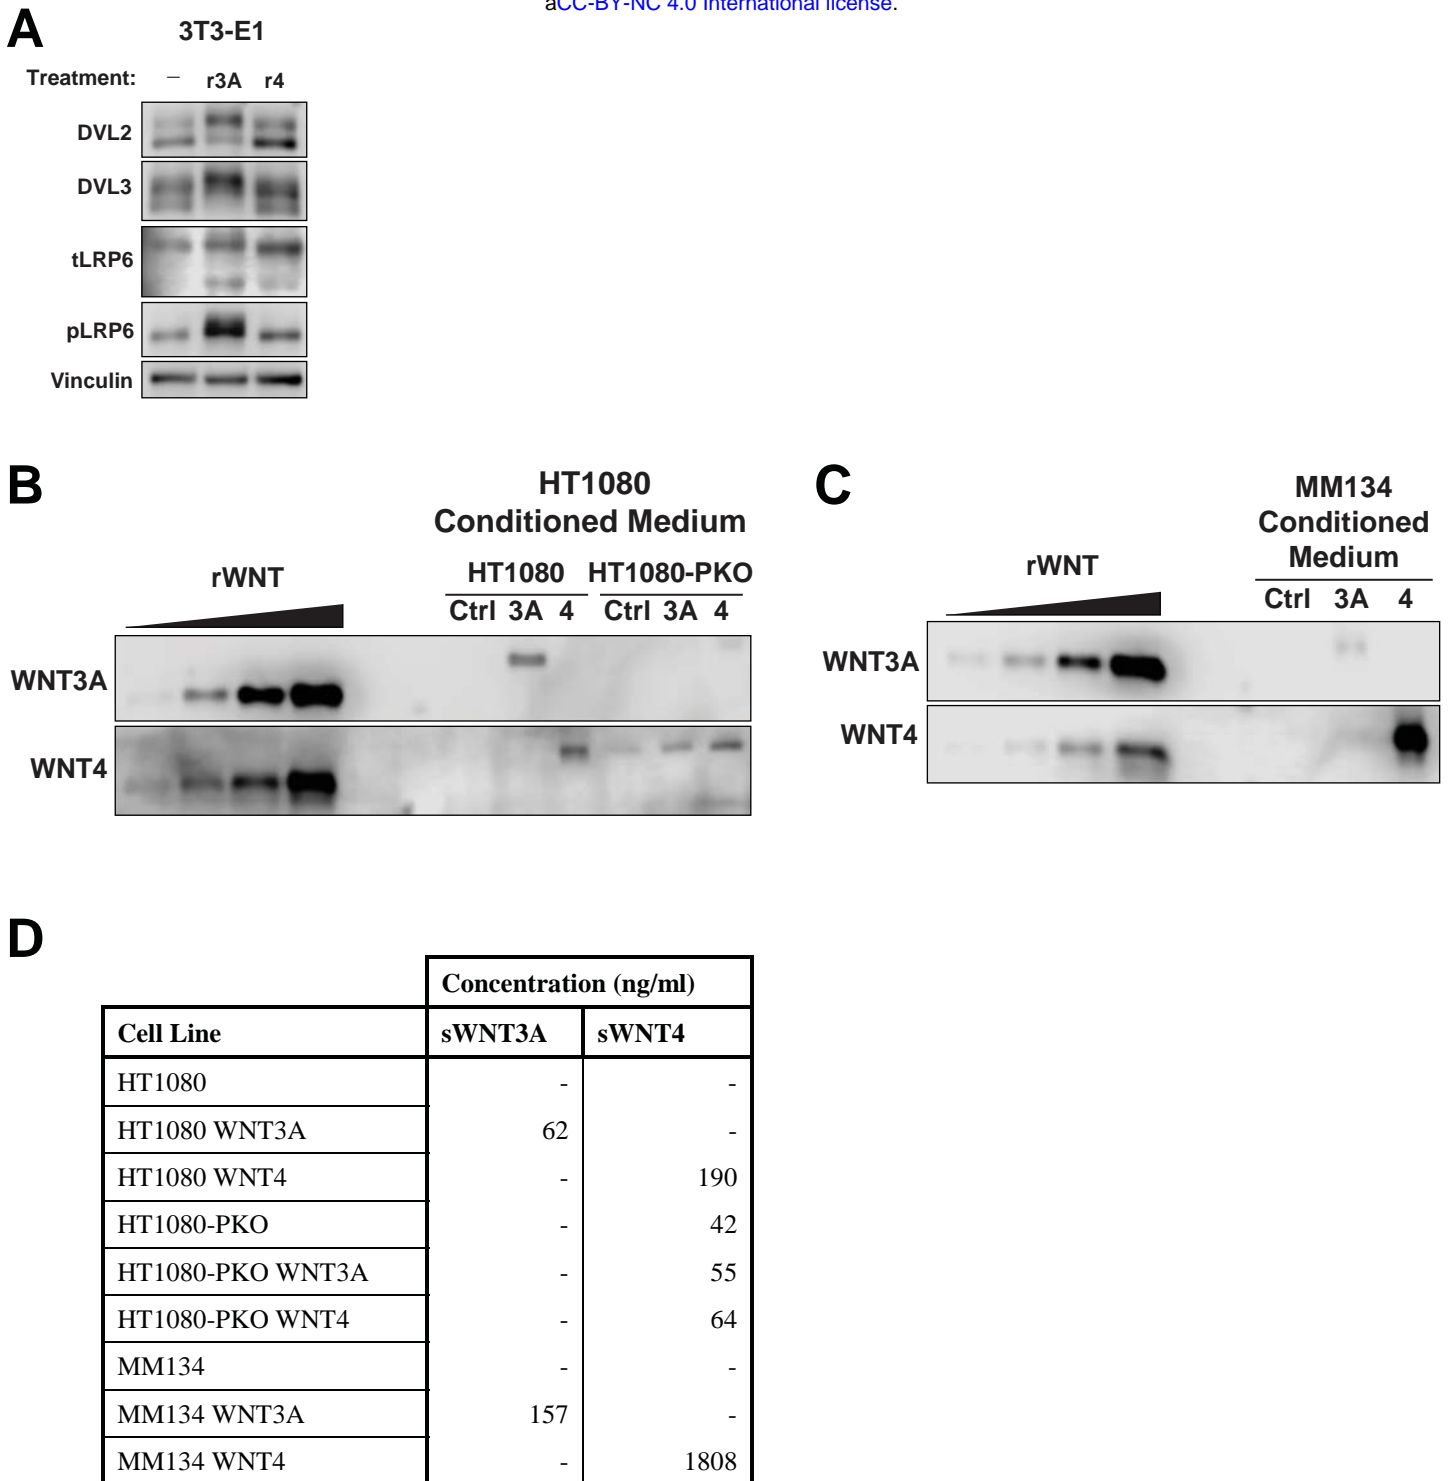

**Supplemental Figure 4. Secreted Wnt proteins are at concentrations sufficient to activate paracrine signaling.**

(A), 3T3-E1 cells were treated for 24hrs with 300ng/ml of either rWNT3A or rWNT4. Immunoblots of whole cell lysates were probed for DVL2, DVL3, total LRP6 and phosphorylated LRP6. (E-F), Serial dilutions of rWNTs (2.5, 5, 10, 20ng) were run on an immunoblot alongside CM collected from HT1080 or MM134 cell lines. Blots were probed for either WNT3A or WNT4, respectively. (G), Estimated concentrations of secreted WNTs (sWNT) present in CM based on linear regression of rWNTs. Volume of CM loaded per well varied from 25-70uL, normalized based on total protein concentration (see Materials and Methods).

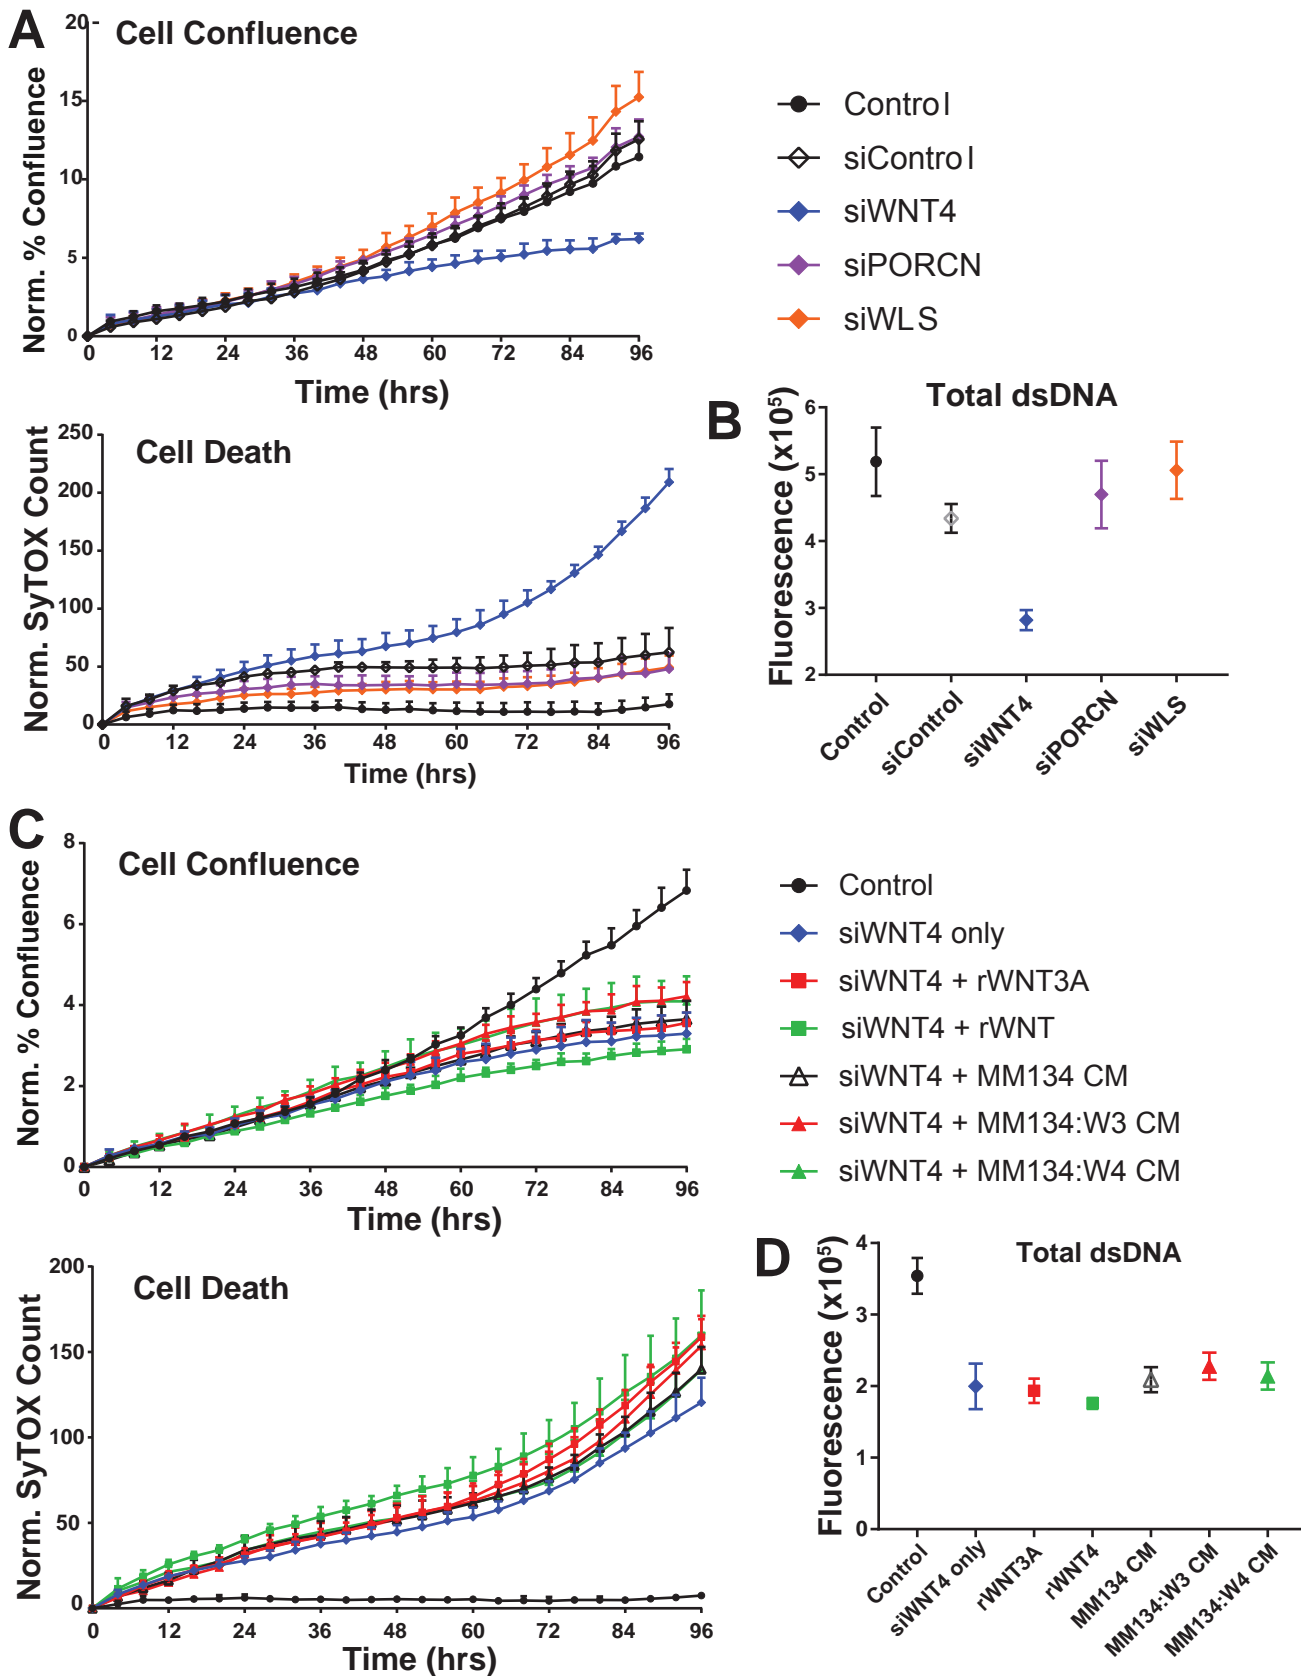

**Supplemental Figure 5. siWLS does not phenocopy siWNT4 and CM does not rescue siWNT4 in MM134.**

(A-B), MM134 were reverse transfected with siRNA as indicated. (C-D), 24hrs after WNT4 knockdown, cells were treated with either rWNT3A (62.5mg/ml), rWNT4 (250ng/ml) or conditioned media (CM). The cells were live cell imaged for (A,C), proliferation (phase-contrast confluence) and death (SyTOX green incorporation). (B,D), Total double stranded DNA was measured from assays in (A,C) at timecourse completion. Point represent mean of six biological replicates  $\pm$  SD.

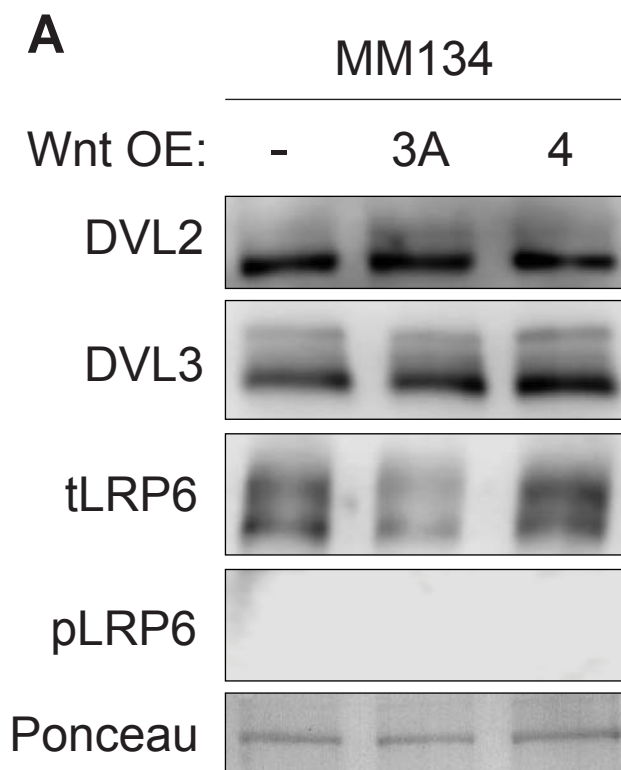

**Supplemental Figure 6. WNT overexpression does not induce autonomous phosphorylation of DVL2/3 in MM134.**

Whole cell lysates from MM134 were harvested and immunoblotted for DVL2, DVL3, total and phosphorylated LRP6.

**A**

| Wnt Source  | Wnt OE | Mode       | Receiver     | Active? |
|-------------|--------|------------|--------------|---------|
| HT1080      | WNT4   | Paracrine  | HT1080:PKO   | No      |
| HT1080      | WNT4   | Paracrine  | 3T3-E1       | No      |
| HT1080:PKO  | WNT4   | Paracrine  | HT1080:PKO   | No      |
| HT1080:PKO  | WNT4   | Paracrine  | 3T3-E1       | No      |
| MM134       | WNT4   | Paracrine  | HT1080:PKO   | No      |
| MM134       | WNT4   | Paracrine  | 3T3-E1       | No      |
| HCC1428     | WNT4   | Paracrine  | 3T3-E1       | No      |
| PEO1        | WNT4   | Paracrine  | 3T3-E1       | No      |
| SUM44PE     | WNT4   | Paracrine  | 3T3-E1       | No      |
| Recombinant | rWNT4  | Paracrine  | HT1080:PKO   | No      |
| Recombinant | rWNT4  | Paracrine  | 3T3-E1       | Yes     |
| HT1080      | WNT4   | Autonomous | (HT1080)     | Yes     |
| HT1080:PKO  | WNT4   | Autonomous | (HT1080:PKO) | Yes     |
| MM134       | WNT4   | Autonomous | (MM134)      | Yes     |

**B**

| Wnt Source  | Wnt OE | Mode       | Receiver     | Active? |
|-------------|--------|------------|--------------|---------|
| HT1080      | WNT3A  | Paracrine  | HT1080:PKO   | Yes     |
| HT1080      | WNT3A  | Paracrine  | 3T3-E1       | Yes     |
| HT1080:PKO  | WNT3A  | Paracrine  | HT1080:PKO   | No*     |
| HT1080:PKO  | WNT3A  | Paracrine  | 3T3-E1       | No*     |
| MM134       | WNT3A  | Paracrine  | HT1080:PKO   | No      |
| MM134       | WNT3A  | Paracrine  | 3T3-E1       | Yes     |
| HCC1428     | WNT3A  | Paracrine  | 3T3-E1       | Yes     |
| PEO1        | WNT3A  | Paracrine  | 3T3-E1       | Yes     |
| SUM44PE     | WNT3A  | Paracrine  | 3T3-E1       | No      |
| Recombinant | rWNT3A | Paracrine  | HT1080:PKO   | Yes     |
| Recombinant | rWNT3A | Paracrine  | 3T3-E1       | Yes     |
| HT1080      | WNT3A  | Autonomous | (HT1080)     | Yes     |
| HT1080:PKO  | WNT3A  | Autonomous | (HT1080:PKO) | Yes     |
| MM134       | WNT3A  | Autonomous | (MM134)      | n/a     |

\*No WNT3A secretion from HT1080-PKO

**Supplemental Figure 7. Summary of paracrine Wnt activity per source and receiver context.**  
Summary of results herein for (A) WNT4 and (B) WNT3A.
